# Supplementary material for: Petiole-Lamina Transition Zone: A Functionally Crucial but Often Overlooked Leaf Trait
Source: MDPI journal article supplement (doi:10.3390/plants10040774), 2021-04-15
Supplement: s1 [file s1]

| Sample | <i>Hosta x tardiana</i><br>'El Niño' | <i>Caladium bicolor</i> | <i>Hemigraphis</i><br><i>alternata</i> | <i>Pilea</i><br><i>peperomioides</i> |
|--------|--------------------------------------|-------------------------|----------------------------------------|--------------------------------------|
|        | [-]                                  | [-]                     | [-]                                    | [-]                                  |
| 1      | 1.35                                 | 0.94                    | 1.22                                   | 1.00                                 |
| 2      | 1.13                                 | 0.89                    | 1.24                                   | 1.10                                 |
| 3      | 1.03                                 | 0.98                    | 1.22                                   | 1.08                                 |
| 4      | 1.13                                 | 0.99                    | 1.24                                   | 0.97                                 |
| 5      | 1.19                                 | 0.91                    | 1.40                                   | 1.08                                 |
| 6      | 1.29                                 | 0.94                    | 1.15                                   | 1.12                                 |
| 7      | 1.34                                 | 0.92                    | 1.44                                   | 1.02                                 |
| 8      | 1.43                                 | 1.04                    | 1.23                                   | 1.05                                 |
| 9      | 1.16                                 | 0.90                    | 1.12                                   | 1.04                                 |
| 10     | 1.19                                 | 0.89                    | 1.14                                   | 1.07                                 |
| 11     | 1.14                                 | 0.90                    | 1.23                                   | 1.06                                 |
| 12     | 0.93                                 | 1.00                    | 1.15                                   | 1.05                                 |
| 13     | 1.13                                 | 0.90                    | 1.21                                   | 1.01                                 |
| 14     | 1.10                                 | 1.03                    | 1.25                                   | 1.11                                 |
| 15     | 1.09                                 | 0.88                    | 1.18                                   | 0.97                                 |
| 16     | 1.09                                 | 1.03                    | 1.30                                   | 1.06                                 |
| 17     | 1.23                                 | 1.12                    | 1.12                                   | 1.09                                 |
| 18     | 1.10                                 | 1.11                    | 1.12                                   | 1.00                                 |
| 19     | 1.20                                 | 0.91                    | 1.31                                   | 1.04                                 |
| 20     | 1.13                                 | 0.96                    | 1.20                                   | 1.11                                 |
| 21     | 1.04                                 | 0.97                    | 1.17                                   | 1.00                                 |
| 22     | 1.06                                 | 0.99                    | 1.24                                   | 1.11                                 |
| 23     | 1.27                                 | 0.95                    | 1.25                                   | 1.00                                 |
| 24     | 1.36                                 | 0.94                    | 1.16                                   | 0.97                                 |
| 25     | 1.11                                 | 1.05                    | 1.17                                   | 0.97                                 |

| Sample | <i>Hosta x tardiana</i><br>'El Niño' | <i>Caladium bicolor</i> | <i>Hemigraphis</i><br><i>alternata</i> | <i>Pilea</i><br><i>peperomioides</i> |
|--------|--------------------------------------|-------------------------|----------------------------------------|--------------------------------------|
|        | [-]                                  | [-]                     | [-]                                    | [-]                                  |
| 1      | 1.58                                 | 0.79                    | 1.30                                   | 1.49                                 |
| 2      | 1.53                                 | 0.76                    | 2.27                                   | 0.95                                 |
| 3      | 1.08                                 | 0.82                    | 0.98                                   | 1.81                                 |
| 4      | 1.88                                 | 0.84                    | 1.09                                   | 0.91                                 |
| 5      | 1.46                                 | 0.91                    | 2.66                                   | 1.18                                 |
| 6      | 1.44                                 | 1.11                    | 1.42                                   | 0.85                                 |
| 7      | 1.00                                 | 0.87                    | 1.06                                   | 1.42                                 |
| 8      | 1.54                                 | 0.84                    | 1.18                                   | 0.94                                 |
| 9      | 1.94                                 | 1.18                    | 1.20                                   | 1.25                                 |
| 10     | 1.89                                 | 0.90                    | 2.09                                   | 1.64                                 |
| 11     | 2.35                                 | 1.04                    | 1.22                                   | 1.31                                 |
| 12     | 1.43                                 | 0.96                    | 0.99                                   | 1.84                                 |
| 13     | 0.93                                 | 1.06                    | 1.69                                   | 0.93                                 |
| 14     | 1.47                                 | 0.72                    | 1.76                                   | 1.22                                 |
| 15     | 1.89                                 | 0.88                    | 1.59                                   | 1.61                                 |
| 16     | 1.62                                 | 0.99                    | 0.84                                   | 0.83                                 |
| 17     | 1.78                                 | 1.10                    | 1.12                                   | 1.73                                 |
| 18     | 1.17                                 | 0.99                    | 1.41                                   | 1.01                                 |
| 19     | 1.08                                 | 0.93                    | 2.19                                   | 0.83                                 |
| 20     | 1.34                                 | 0.91                    | 2.35                                   | 1.08                                 |
| 21     | 1.91                                 | 0.83                    | 1.36                                   | 1.50                                 |
| 22     | 1.44                                 | 0.91                    | 1.47                                   | 1.14                                 |
| 23     | 1.39                                 | 0.75                    | 1.51                                   | 1.34                                 |
| 24     | 1.64                                 | 1.39                    | 1.27                                   | 1.02                                 |
| 25     | 1.38                                 | 0.85                    | 0.91                                   | 1.10                                 |

| <i>I/J</i> <sub>transition</sub> of 6 transition zone samples |                                      |                         |                                        |                                      |
|---------------------------------------------------------------|--------------------------------------|-------------------------|----------------------------------------|--------------------------------------|
| Sample                                                        | <i>Hosta x tardiana</i><br>'El Niño' | <i>Caladium bicolor</i> | <i>Hemigraphis</i><br><i>alternata</i> | <i>Pilea</i><br><i>peperomioides</i> |
|                                                               | [-]                                  | [-]                     | [-]                                    | [-]                                  |
| 1                                                             | 0.54                                 | 0.54                    | 0.34                                   | 0.42                                 |
| 2                                                             | 0.47                                 | 0.65                    | 0.10                                   | 0.33                                 |
| 3                                                             | 0.44                                 | 0.49                    | 0.39                                   | 0.56                                 |
| 4                                                             | 0.36                                 | 0.55                    | 0.16                                   | 0.43                                 |
| 5                                                             | 0.53                                 | 0.74                    | 0.46                                   | 0.41                                 |
| 6 (detailed serial section)                                   | 0.23                                 | 0.68                    | 0.59                                   | 0.52                                 |

| <i>I/J</i> <sub>petiole</sub> of 25 petiole samples |                                      |                         |                                        |                                      |
|-----------------------------------------------------|--------------------------------------|-------------------------|----------------------------------------|--------------------------------------|
| Sample                                              | <i>Hosta x tardiana</i><br>'El Niño' | <i>Caladium bicolor</i> | <i>Hemigraphis</i><br><i>alternata</i> | <i>Pilea</i><br><i>peperomioides</i> |
|                                                     | [-]                                  | [-]                     | [-]                                    | [-]                                  |
| 1                                                   | 0.27                                 | 0.56                    | 0.36                                   | 0.50                                 |
| 2                                                   | 0.32                                 | 0.56                    | 0.39                                   | 0.45                                 |
| 3                                                   | 0.37                                 | 0.51                    | 0.39                                   | 0.45                                 |
| 4                                                   | 0.34                                 | 0.50                    | 0.42                                   | 0.52                                 |
| 5                                                   | 0.31                                 | 0.54                    | 0.33                                   | 0.45                                 |
| 6                                                   | 0.28                                 | 0.52                    | 0.42                                   | 0.47                                 |
| 7                                                   | 0.30                                 | 0.54                    | 0.33                                   | 0.50                                 |
| 8                                                   | 0.27                                 | 0.49                    | 0.40                                   | 0.47                                 |
| 9                                                   | 0.33                                 | 0.56                    | 0.42                                   | 0.47                                 |
| 10                                                  | 0.31                                 | 0.55                    | 0.43                                   | 0.45                                 |
| 11                                                  | 0.34                                 | 0.58                    | 0.38                                   | 0.47                                 |
| 12                                                  | 0.42                                 | 0.48                    | 0.43                                   | 0.48                                 |
| 13                                                  | 0.34                                 | 0.58                    | 0.40                                   | 0.50                                 |
| 14                                                  | 0.38                                 | 0.51                    | 0.40                                   | 0.44                                 |
| 15                                                  | 0.35                                 | 0.56                    | 0.40                                   | 0.51                                 |
| 16                                                  | 0.36                                 | 0.49                    | 0.38                                   | 0.47                                 |
| 17                                                  | 0.31                                 | 0.44                    | 0.41                                   | 0.47                                 |
| 18                                                  | 0.35                                 | 0.51                    | 0.41                                   | 0.49                                 |
| 19                                                  | 0.29                                 | 0.55                    | 0.34                                   | 0.48                                 |
| 20                                                  | 0.32                                 | 0.52                    | 0.40                                   | 0.45                                 |
| 21                                                  | 0.38                                 | 0.51                    | 0.42                                   | 0.50                                 |
| 22                                                  | 0.33                                 | 0.53                    | 0.37                                   | 0.45                                 |
| 23                                                  | 0.28                                 | 0.54                    | 0.40                                   | 0.50                                 |
| 24                                                  | 0.29                                 | 0.54                    | 0.41                                   | 0.52                                 |
| 25                                                  | 0.35                                 | 0.47                    | 0.42                                   | 0.51                                 |

| $a_A$ of the apical petiole parts of 6 transition zone samples |                                      |                         |                                        |                                      |
|----------------------------------------------------------------|--------------------------------------|-------------------------|----------------------------------------|--------------------------------------|
| Sample                                                         | <i>Hosta x tardiana</i><br>'El Niño' | <i>Caladium bicolor</i> | <i>Hemigraphis</i><br><i>alternata</i> | <i>Pilea</i><br><i>peperomioides</i> |
|                                                                | [mm <sup>2</sup> /mm]                | [mm <sup>2</sup> /mm]   | [mm <sup>2</sup> /mm]                  | [mm <sup>2</sup> /mm]                |
| 1                                                              | 0.07                                 | 2.45                    | -0.09                                  | 0.28                                 |
| 2                                                              | -0.01                                | 0.83                    | -0.09                                  | 0.12                                 |
| 3                                                              | 1.59                                 | 0.28                    | 0.01                                   | 0.42                                 |
| 4                                                              | 1.37                                 | 0.93                    | -0.04                                  | -0.07                                |
| 5                                                              | -0.06                                | 0.48                    | 0.12                                   | 0.13                                 |
| 6 (detailed serial section)                                    | 0.14                                 | 0.35                    | 0.13                                   | -0.18                                |

| $a_I$ of the apical petiole parts of 6 transition zone samples |                                      |                         |                                        |                                      |
|----------------------------------------------------------------|--------------------------------------|-------------------------|----------------------------------------|--------------------------------------|
| Sample                                                         | <i>Hosta x tardiana</i><br>'El Niño' | <i>Caladium bicolor</i> | <i>Hemigraphis</i><br><i>alternata</i> | <i>Pilea</i><br><i>peperomioides</i> |
|                                                                | [mm <sup>4</sup> /mm]                | [mm <sup>4</sup> /mm]   | [mm <sup>4</sup> /mm]                  | [mm <sup>4</sup> /mm]                |
| 1                                                              | 0.62                                 | 6.60                    | -0.04                                  | 0.39                                 |
| 2                                                              | 1.47                                 | 1.81                    | -0.08                                  | 0.08                                 |
| 3                                                              | 14.93                                | 0.28                    | 0.00                                   | 0.61                                 |
| 4                                                              | 6.98                                 | 1.90                    | -0.01                                  | 0.03                                 |
| 5                                                              | 1.72                                 | 0.91                    | 0.16                                   | 0.08                                 |
| 6 (detailed serial section)                                    | 1.13                                 | 0.31                    | 0.05                                   | -1.58                                |

| $a_J$ of the apical petiole parts of 6 transition zone samples |                                      |                         |                                        |                                      |
|----------------------------------------------------------------|--------------------------------------|-------------------------|----------------------------------------|--------------------------------------|
| Sample                                                         | <i>Hosta x tardiana</i><br>'El Niño' | <i>Caladium bicolor</i> | <i>Hemigraphis</i><br><i>alternata</i> | <i>Pilea</i><br><i>peperomioides</i> |
|                                                                | [mm <sup>4</sup> /mm]                | [mm <sup>4</sup> /mm]   | [mm <sup>4</sup> /mm]                  | [mm <sup>4</sup> /mm]                |
| 1                                                              | 1.42                                 | 12.57                   | -0.06                                  | 0.56                                 |
| 2                                                              | 4.76                                 | 3.07                    | -0.06                                  | 0.12                                 |
| 3                                                              | 36.73                                | 1.12                    | 0.01                                   | 0.90                                 |
| 4                                                              | 22.83                                | 3.43                    | -0.03                                  | -0.16                                |
| 5                                                              | 3.13                                 | 1.30                    | 0.52                                   | 0.32                                 |
| 6 (detailed serial section)                                    | 3.89                                 | 0.93                    | 0.16                                   | -1.14                                |

**Explanations:**

**A** = cross-sectional area

**I** = axial second moment of area

**J** = polar second moment of area

| $b_A$ of the transition zone parts of 6 transition zone samples |                                      |                         |                                        |                                      |
|-----------------------------------------------------------------|--------------------------------------|-------------------------|----------------------------------------|--------------------------------------|
| Sample                                                          | <i>Hosta x tardiana</i><br>'El Niño' | <i>Caladium bicolor</i> | <i>Hemigraphis</i><br><i>alternata</i> | <i>Pilea</i><br><i>peperomioides</i> |
|                                                                 | [mm <sup>-1</sup> ]                  | [mm <sup>-1</sup> ]     | [mm <sup>-1</sup> ]                    | [mm <sup>-1</sup> ]                  |
| 1                                                               | 0.08                                 | 0.49                    | 6.48                                   | 2.14                                 |
| 2                                                               | 0.29                                 | 0.45                    | 3.32                                   | 1.74                                 |
| 3                                                               | 0.12                                 | 0.54                    | 2.16                                   | 2.67                                 |
| 4                                                               | 0.22                                 | 0.37                    | 3.31                                   | 1.74                                 |
| 5                                                               | 0.12                                 | 0.71                    | 1.75                                   | 3.33                                 |
| 6 (detailed serial section)                                     | 0.06                                 | 0.56                    | 0.87                                   | 0.58                                 |

| $b_I$ of the transition zone parts of 6 transition zone samples |                                      |                         |                                        |                                      |
|-----------------------------------------------------------------|--------------------------------------|-------------------------|----------------------------------------|--------------------------------------|
| Sample                                                          | <i>Hosta x tardiana</i><br>'El Niño' | <i>Caladium bicolor</i> | <i>Hemigraphis</i><br><i>alternata</i> | <i>Pilea</i><br><i>peperomioides</i> |
|                                                                 | [mm <sup>-1</sup> ]                  | [mm <sup>-1</sup> ]     | [mm <sup>-1</sup> ]                    | [mm <sup>-1</sup> ]                  |
| 1                                                               | 0.29                                 | 1.31                    | 19.61                                  | 3.83                                 |
| 2                                                               | 1.26                                 | 1.32                    | 9.06                                   | 3.59                                 |
| 3                                                               | 0.45                                 | 1.37                    | 7.24                                   | 5.13                                 |
| 4                                                               | 0.95                                 | 1.14                    | 7.28                                   | 3.90                                 |
| 5                                                               | 0.48                                 | 1.56                    | 6.25                                   | 6.45                                 |
| 6 (detailed serial section)                                     | 0.33                                 | 1.55                    | 3.68                                   | 1.30                                 |

| $b_J$ of the transition zone parts of 6 transition zone samples |                                      |                         |                                        |                                      |
|-----------------------------------------------------------------|--------------------------------------|-------------------------|----------------------------------------|--------------------------------------|
| Sample                                                          | <i>Hosta x tardiana</i><br>'El Niño' | <i>Caladium bicolor</i> | <i>Hemigraphis</i><br><i>alternata</i> | <i>Pilea</i><br><i>peperomioides</i> |
|                                                                 | [mm <sup>-1</sup> ]                  | [mm <sup>-1</sup> ]     | [mm <sup>-1</sup> ]                    | [mm <sup>-1</sup> ]                  |
| 1                                                               | 0.32                                 | 1.32                    | 22.73                                  | 4.42                                 |
| 2                                                               | 1.02                                 | 1.24                    | 12.38                                  | 3.74                                 |
| 3                                                               | 0.49                                 | 1.39                    | 8.92                                   | 5.45                                 |
| 4                                                               | 0.80                                 | 1.17                    | 13.40                                  | 3.94                                 |
| 5                                                               | 0.45                                 | 1.67                    | 6.20                                   | 8.29                                 |
| 6 (detailed serial section)                                     | 0.31                                 | 1.43                    | 3.12                                   | 1.27                                 |

**Explanations:**

$A$  = cross-sectional area

$I$  = axial second moment of area

$J$  = polar second moment of area

| Sample 1       |                               |                                      |                                      |
|----------------|-------------------------------|--------------------------------------|--------------------------------------|
| Section height | Cross-sectional area <i>A</i> | Axial second moment of area <i>I</i> | Polar second moment of area <i>J</i> |
| [mm]           | [mm <sup>2</sup> ]            | [mm <sup>4</sup> ]                   | [mm <sup>4</sup> ]                   |
| 0.0            | 8.23                          | 8.05                                 | 19.44                                |
| 0.2            | 9.41                          | 11.02                                | 23.42                                |
| 0.4            | 9.16                          | 9.88                                 | 22.70                                |
| 0.6            | 9.45                          | 11.13                                | 23.58                                |
| 0.8            | 8.93                          | 9.01                                 | 22.45                                |
| 1.0            | 8.93                          | 9.20                                 | 22.26                                |
| 1.2            | 8.95                          | 9.96                                 | 21.54                                |
| 1.4            | 8.80                          | 8.50                                 | 22.18                                |
| 1.6            | 8.77                          | 8.85                                 | 22.07                                |
| 1.8            | 9.10                          | 9.71                                 | 23.52                                |
| 2.0            | 8.99                          | 9.51                                 | 23.34                                |
| 2.2            | 9.07                          | 10.28                                | 23.71                                |
| 2.4            | 9.19                          | 10.63                                | 23.30                                |
| 2.6            | 9.19                          | 10.14                                | 24.54                                |
| 2.8            | 9.20                          | 10.18                                | 24.20                                |
| 3.0            | 9.09                          | 10.33                                | 23.93                                |
| 3.2            | 9.23                          | 10.93                                | 24.35                                |
| 3.4            | 9.13                          | 10.01                                | 24.94                                |
| 3.6            | 9.17                          | 10.35                                | 24.87                                |
| 3.8            | 9.14                          | 10.14                                | 25.29                                |
| 4.0            | 9.48                          | 11.96                                | 25.98                                |
| 4.2            | 9.18                          | 10.67                                | 25.74                                |
| 4.4            | 8.94                          | 10.44                                | 24.77                                |
| 4.6            | 9.01                          | 10.54                                | 25.89                                |
| 4.8            | 9.29                          | 11.74                                | 27.23                                |
| 5.0            | 9.41                          | 11.75                                | 28.95                                |
| 5.2            | 9.28                          | 10.37                                | 27.47                                |
| 5.4            | 9.55                          | 13.31                                | 30.23                                |
| 5.6            | 9.05                          | 10.45                                | 25.70                                |
| 5.8            | 9.38                          | 11.95                                | 28.95                                |
| 6.0            | 9.49                          | 13.50                                | 30.73                                |
| 6.2            | 9.19                          | 10.94                                | 28.53                                |
| 6.4            | 9.62                          | 14.32                                | 32.10                                |
| 6.6            | 9.29                          | 12.48                                | 29.16                                |
| 6.8            | 9.56                          | 15.71                                | 33.58                                |
| 7.0            | 9.37                          | 14.49                                | 30.99                                |
| 7.2            | 9.65                          | 14.86                                | 31.82                                |
| 7.4            | 11.42                         | 27.82                                | 55.53                                |
| 7.6            | 10.43                         | 21.08                                | 37.74                                |
| 7.8            | 10.69                         | 24.84                                | 43.06                                |
| 8.0            | 10.75                         | 24.81                                | 42.60                                |
| 8.2            | 10.98                         | 27.53                                | 50.44                                |
| 8.4            | 9.50                          | 16.59                                | 34.02                                |
| 8.6            | 11.62                         | 28.75                                | 67.49                                |

| Sample 1 (continued) |                               |                                      |                                      |
|----------------------|-------------------------------|--------------------------------------|--------------------------------------|
| Section height       | Cross-sectional area <i>A</i> | Axial second moment of area <i>I</i> | Polar second moment of area <i>J</i> |
| [mm]                 | [mm <sup>2</sup> ]            | [mm <sup>4</sup> ]                   | [mm <sup>4</sup> ]                   |
| 8.8                  | 11.49                         | 31.08                                | 58.21                                |
| 9.0                  | 10.64                         | 33.03                                | 49.60                                |
| 9.2                  | 12.62                         | 38.49                                | 78.19                                |
| 9.4                  | 12.50                         | 40.03                                | 60.33                                |
| 9.6                  | 11.00                         | 33.64                                | 57.72                                |
| 9.8                  | 13.54                         | 41.51                                | 130.41                               |

| Sample 2       |                               |                                      |                                      |
|----------------|-------------------------------|--------------------------------------|--------------------------------------|
| Section height | Cross-sectional area <i>A</i> | Axial second moment of area <i>I</i> | Polar second moment of area <i>J</i> |
| [mm]           | [mm <sup>2</sup> ]            | [mm <sup>4</sup> ]                   | [mm <sup>4</sup> ]                   |
| 0.0            | 15.16                         | 19.57                                | 60.00                                |
| 0.2            | 15.00                         | 18.92                                | 58.46                                |
| 0.4            | 15.41                         | 18.90                                | 62.99                                |
| 0.6            | 15.38                         | 21.01                                | 63.93                                |
| 0.8            | 15.28                         | 22.05                                | 67.24                                |
| 1.0            | 15.41                         | 22.14                                | 66.10                                |
| 1.2            | 15.25                         | 21.15                                | 65.17                                |
| 1.4            | 14.99                         | 20.04                                | 61.32                                |
| 1.6            | 15.37                         | 23.63                                | 70.88                                |
| 1.8            | 15.17                         | 22.95                                | 70.37                                |
| 2.0            | 15.31                         | 22.33                                | 73.05                                |
| 2.2            | 15.24                         | 22.63                                | 71.31                                |
| 2.4            | 14.84                         | 21.05                                | 65.60                                |
| 2.6            | 14.98                         | 20.89                                | 68.55                                |
| 2.8            | 14.61                         | 21.20                                | 67.26                                |
| 3.0            | 15.06                         | 22.49                                | 71.48                                |
| 3.2            | 15.51                         | 22.94                                | 78.67                                |
| 3.4            | 15.27                         | 24.20                                | 75.33                                |
| 3.6            | 14.65                         | 20.81                                | 67.09                                |
| 3.8            | 15.22                         | 26.00                                | 77.35                                |
| 4.0            | 15.95                         | 31.64                                | 93.52                                |
| 4.2            | 16.15                         | 33.39                                | 99.87                                |
| 4.4            | 17.33                         | 63.55                                | 144.35                               |
| 4.6            | 17.75                         | 80.35                                | 155.51                               |
| 4.8            | 18.71                         | 81.54                                | 173.17                               |
| 5.0            | 18.76                         | 93.12                                | 187.26                               |
| 5.2            | 22.82                         | 155.68                               | 395.24                               |
| 5.4            | 22.53                         | 183.42                               | 321.16                               |

| Sample 3       |                               |                                      |                                      |
|----------------|-------------------------------|--------------------------------------|--------------------------------------|
| Section height | Cross-sectional area <i>A</i> | Axial second moment of area <i>I</i> | Polar second moment of area <i>J</i> |
| [mm]           | [mm <sup>2</sup> ]            | [mm <sup>4</sup> ]                   | [mm <sup>4</sup> ]                   |
| 0.0            | 17.47                         | 31.41                                | 72.58                                |
| 0.2            | 15.22                         | 20.41                                | 50.87                                |
| 0.4            | 14.06                         | 14.90                                | 42.92                                |
| 0.6            | 18.87                         | 37.04                                | 124.53                               |
| 0.8            | 17.94                         | 30.58                                | 91.19                                |
| 1.0            | 17.91                         | 32.95                                | 94.79                                |
| 1.2            | 16.13                         | 22.97                                | 65.64                                |
| 1.4            | 15.54                         | 19.92                                | 58.19                                |
| 1.6            | 19.51                         | 53.90                                | 139.79                               |
| 1.8            | 19.14                         | 59.17                                | 130.71                               |
| 2.0            | 19.28                         | 43.10                                | 124.86                               |
| 2.2            | 21.39                         | 79.02                                | 189.14                               |
| 2.4            | 19.61                         | 51.81                                | 144.09                               |
| 2.6            | 18.83                         | 46.13                                | 124.35                               |
| 2.8            | 17.44                         | 44.95                                | 106.67                               |
| 3.0            | 21.24                         | 102.93                               | 234.23                               |
| 3.2            | 21.70                         | 108.27                               | 246.64                               |
| 3.4            | 22.14                         | 125.44                               | 240.71                               |
| 3.6            | 19.81                         | 100.10                               | 185.04                               |
| 3.8            | 23.68                         | 113.46                               | 386.81                               |
| 4.0            | 22.52                         | 122.55                               | 279.94                               |
| 4.2            | 23.89                         | 142.55                               | 377.05                               |
| 4.4            | 23.73                         | 137.65                               | 377.38                               |
| 4.6            | 22.68                         | 158.84                               | 304.02                               |

| Sample 4       |                               |                                      |                                      |
|----------------|-------------------------------|--------------------------------------|--------------------------------------|
| Section height | Cross-sectional area <i>A</i> | Axial second moment of area <i>I</i> | Polar second moment of area <i>J</i> |
| [mm]           | [mm <sup>2</sup> ]            | [mm <sup>4</sup> ]                   | [mm <sup>4</sup> ]                   |
| 0.0            | 11.20                         | 11.87                                | 38.93                                |
| 0.2            | 9.74                          | 11.29                                | 27.48                                |
| 0.4            | 9.42                          | 9.09                                 | 24.02                                |
| 0.6            | 7.99                          | 6.24                                 | 18.87                                |
| 0.8            | 9.12                          | 8.67                                 | 26.06                                |
| 1.0            | 9.56                          | 8.00                                 | 26.48                                |
| 1.2            | 9.22                          | 8.81                                 | 28.96                                |
| 1.4            | 9.70                          | 11.27                                | 31.95                                |
| 1.6            | 11.95                         | 18.91                                | 58.74                                |
| 1.8            | 11.69                         | 19.81                                | 58.54                                |
| 2.0            | 12.96                         | 21.56                                | 75.18                                |
| 2.2            | 11.05                         | 18.86                                | 54.04                                |
| 2.4            | 13.24                         | 28.83                                | 89.58                                |



| Sample 4 (continued) |                               |                                      |                                      |
|----------------------|-------------------------------|--------------------------------------|--------------------------------------|
| Section height       | Cross-sectional area <i>A</i> | Axial second moment of area <i>I</i> | Polar second moment of area <i>J</i> |
| [mm]                 | [mm <sup>2</sup> ]            | [mm <sup>4</sup> ]                   | [mm <sup>4</sup> ]                   |
| 2.6                  | 12.48                         | 25.89                                | 82.42                                |
| 2.8                  | 15.13                         | 62.56                                | 154.54                               |
| 3.0                  | 14.68                         | 45.36                                | 142.80                               |
| 3.2                  | 16.12                         | 70.44                                | 196.92                               |
| 3.4                  | 15.08                         | 47.01                                | 166.44                               |
| 3.6                  | 16.72                         | 90.26                                | 238.17                               |
| 3.8                  | 17.50                         | 117.07                               | 263.27                               |

| Sample 5       |                               |                                      |                                      |
|----------------|-------------------------------|--------------------------------------|--------------------------------------|
| Section height | Cross-sectional area <i>A</i> | Axial second moment of area <i>I</i> | Polar second moment of area <i>J</i> |
| [mm]           | [mm <sup>2</sup> ]            | [mm <sup>4</sup> ]                   | [mm <sup>4</sup> ]                   |
| 0.0            | 15.63                         | 20.80                                | 54.71                                |
| 0.2            | 15.01                         | 20.13                                | 53.65                                |
| 0.4            | 14.80                         | 21.37                                | 51.52                                |
| 0.6            | 14.28                         | 17.71                                | 46.12                                |
| 0.8            | 14.92                         | 21.89                                | 53.95                                |
| 1.0            | 15.21                         | 24.23                                | 58.02                                |
| 1.2            | 14.90                         | 22.42                                | 60.89                                |
| 1.4            | 13.48                         | 17.22                                | 44.46                                |
| 1.6            | 14.41                         | 19.68                                | 52.90                                |
| 1.8            | 12.78                         | 15.97                                | 42.29                                |
| 2.0            | 14.13                         | 18.76                                | 53.67                                |
| 2.2            | 14.32                         | 21.13                                | 53.47                                |
| 2.4            | 14.18                         | 20.83                                | 49.38                                |
| 2.6            | 12.93                         | 23.51                                | 43.02                                |
| 2.8            | 14.45                         | 23.65                                | 71.97                                |
| 3.0            | 12.90                         | 20.71                                | 39.84                                |
| 3.2            | 14.06                         | 20.15                                | 47.48                                |
| 3.4            | 12.15                         | 13.87                                | 43.14                                |
| 3.6            | 14.38                         | 23.24                                | 58.73                                |
| 3.8            | 12.41                         | 21.97                                | 50.29                                |
| 4.0            | 11.56                         | 18.37                                | 48.69                                |
| 4.2            | 14.34                         | 22.63                                | 57.98                                |
| 4.4            | 14.59                         | 22.85                                | 82.60                                |
| 4.6            | 15.43                         | 27.86                                | 70.02                                |
| 4.8            | 14.87                         | 19.46                                | 58.32                                |
| 5.0            | 15.18                         | 29.42                                | 63.95                                |
| 5.2            | 13.95                         | 26.54                                | 65.56                                |
| 5.4            | 16.82                         | 43.87                                | 95.52                                |
| 5.6            | 13.55                         | 25.04                                | 55.91                                |
| 5.8            | 12.52                         | 23.16                                | 45.64                                |

| Sample 5 (continued) |                          |                                 |                                 |
|----------------------|--------------------------|---------------------------------|---------------------------------|
| Section height       | Cross-sectional area $A$ | Axial second moment of area $I$ | Polar second moment of area $J$ |
| [mm]                 | [mm <sup>2</sup> ]       | [mm <sup>4</sup> ]              | [mm <sup>4</sup> ]              |
| 6.0                  | 15.40                    | 36.82                           | 80.04                           |
| 6.2                  | 13.84                    | 39.10                           | 64.74                           |
| 6.4                  | 17.03                    | 56.76                           | 106.77                          |
| 6.6                  | 16.76                    | 54.93                           | 106.45                          |
| 6.8                  | 16.95                    | 56.76                           | 111.10                          |
| 7.0                  | 16.35                    | 59.40                           | 112.99                          |
| 7.2                  | 17.75                    | 72.40                           | 124.88                          |
| 7.4                  | 17.87                    | 76.25                           | 138.76                          |
| 7.6                  | 18.63                    | 85.58                           | 145.97                          |
| 7.8                  | 17.24                    | 81.08                           | 155.69                          |
| 8.0                  | 18.59                    | 87.79                           | 168.31                          |
| 8.2                  | 19.01                    | 94.54                           | 177.99                          |
| 8.4                  | 17.00                    | 69.85                           | 138.12                          |
| 8.6                  | 20.16                    | 129.27                          | 201.25                          |
| 8.8                  | 21.03                    | 149.44                          | 237.95                          |
| 9.0                  | 21.09                    | 150.62                          | 278.02                          |
| 9.2                  | 22.96                    | 196.42                          | 383.24                          |
| 9.4                  | 24.00                    | 296.87                          | 426.39                          |

| Sample 6 (detailed serial section) |                          |                                 |                                 |                            |                                              |
|------------------------------------|--------------------------|---------------------------------|---------------------------------|----------------------------|----------------------------------------------|
| Section height                     | Cross-sectional area $A$ | Axial second moment of area $I$ | Polar second moment of area $J$ | Number of vascular bundles | Area fraction of the vascular bundles $AF_v$ |
| [mm]                               | [mm <sup>2</sup> ]       | [mm <sup>4</sup> ]              | [mm <sup>4</sup> ]              | [-]                        | [%]                                          |
| 0.0                                | 6.70                     | 4.81                            | 16.50                           | 18                         | 8.30                                         |
| 0.4                                | 5.81                     | 3.06                            | 10.93                           | 14                         | 8.75                                         |
| 0.5                                | 6.14                     | 3.86                            | 12.64                           | 15                         | 7.88                                         |
| 0.6                                | 6.48                     | 4.06                            | 14.11                           | 16                         | 7.79                                         |
| 1.0                                | 6.11                     | 3.61                            | 14.36                           | 18                         | 8.16                                         |
| 1.1                                | 6.53                     | 4.67                            | 17.97                           | 17                         | 7.87                                         |
| 1.2                                | 5.88                     | 3.61                            | 11.81                           | 14                         | 7.08                                         |
| 1.3                                | 6.04                     | 3.96                            | 14.05                           | 17                         | 8.07                                         |
| 1.4                                | 6.06                     | 3.58                            | 14.55                           | 16                         | 7.95                                         |
| 1.5                                | 6.31                     | 4.59                            | 17.57                           | 20                         | 8.23                                         |
| 1.6                                | 6.32                     | 4.41                            | 17.82                           | 21                         | 7.88                                         |
| 1.7                                | 5.90                     | 3.73                            | 13.50                           | 17                         | 7.98                                         |
| 1.8                                | 6.30                     | 4.89                            | 18.57                           | 19                         | 8.77                                         |
| 1.9                                | 6.36                     | 5.34                            | 18.81                           | 19                         | 8.45                                         |
| 2.2                                | 6.16                     | 4.92                            | 16.26                           | 20                         | 8.31                                         |
| 2.3                                | 6.38                     | 5.47                            | 19.72                           | 20                         | 8.20                                         |
| 2.4                                | 6.06                     | 4.68                            | 16.34                           | 19                         | 8.16                                         |
| 2.5                                | 6.11                     | 4.87                            | 16.76                           | 17                         | 8.52                                         |
| 2.6                                | 6.38                     | 5.75                            | 20.22                           | 17                         | 7.67                                         |

| Sample 6 (detailed serial section) (continued) |                          |                                 |                                 |                            |                                              |
|------------------------------------------------|--------------------------|---------------------------------|---------------------------------|----------------------------|----------------------------------------------|
| Section height                                 | Cross-sectional area $A$ | Axial second moment of area $I$ | Polar second moment of area $J$ | Number of vascular bundles | Area fraction of the vascular bundles $AF_v$ |
| [mm]                                           | [mm <sup>2</sup> ]       | [mm <sup>4</sup> ]              | [mm <sup>4</sup> ]              | [-]                        | [%]                                          |
| 2.8                                            | 6.47                     | 6.07                            | 21.50                           | 17                         | 7.14                                         |
| 2.9                                            | 6.24                     | 5.07                            | 18.44                           | 16                         | 6.89                                         |
| 3.1                                            | 6.26                     | 5.45                            | 19.00                           | 16                         | 7.40                                         |
| 3.2                                            | 6.24                     | 4.74                            | 19.16                           | 16                         | 7.47                                         |
| 3.4                                            | 6.60                     | 6.01                            | 24.46                           | 20                         | 8.01                                         |
| 3.5                                            | 6.59                     | 7.11                            | 25.17                           | 19                         | 9.00                                         |
| 3.7                                            | 6.63                     | 6.84                            | 25.65                           | 20                         | 7.74                                         |
| 3.8                                            | 6.52                     | 8.24                            | 21.83                           | 17                         | 8.43                                         |
| 3.9                                            | 6.77                     | 6.85                            | 28.26                           | 18                         | 7.34                                         |
| 4.0                                            | 6.55                     | 7.88                            | 24.28                           | 17                         | 7.31                                         |
| 4.1                                            | 6.85                     | 5.87                            | 31.90                           | 17                         | 7.48                                         |
| 4.2                                            | 6.79                     | 8.68                            | 28.66                           | 18                         | 6.88                                         |
| 4.4                                            | 6.68                     | 9.23                            | 25.30                           | 18                         | 7.08                                         |
| 4.5                                            | 7.02                     | 9.34                            | 33.86                           | 19                         | 6.87                                         |
| 4.6                                            | 6.93                     | 7.62                            | 33.32                           | 19                         | 7.77                                         |
| 4.9                                            | 7.12                     | 10.09                           | 37.55                           | 20                         | 7.12                                         |
| 5.0                                            | 7.23                     | 12.38                           | 39.20                           | 21                         | 7.61                                         |
| 5.1                                            | 7.23                     | 13.28                           | 39.22                           | 20                         | 6.73                                         |
| 5.2                                            | 7.37                     | 7.85                            | 44.64                           | 18                         | 6.45                                         |
| 5.4                                            | 7.50                     | 10.56                           | 45.45                           | 17                         | 6.47                                         |
| 5.5                                            | 7.57                     | 13.77                           | 46.09                           | 18                         | 6.72                                         |
| 5.7                                            | 7.53                     | 11.59                           | 49.38                           | 19                         | 6.72                                         |
| 5.8                                            | 7.69                     | 13.94                           | 51.59                           | 20                         | 6.91                                         |
| 5.9                                            | 7.68                     | 13.48                           | 52.43                           | 21                         | 7.47                                         |
| 6.0                                            | 7.71                     | 11.65                           | 56.35                           | 20                         | 7.26                                         |
| 6.4                                            | 7.95                     | 11.93                           | 65.12                           | 20                         | 6.38                                         |
| 6.5                                            | 8.14                     | 13.39                           | 67.39                           | 20                         | 5.67                                         |
| 6.7                                            | 7.92                     | 27.45                           | 54.47                           | 21                         | 6.25                                         |
| 6.9                                            | 8.35                     | 8.89                            | 82.39                           | 24                         | 6.58                                         |
| 7.0                                            | 8.17                     | 13.57                           | 77.40                           | 21                         | 8.28                                         |
| 7.1                                            | 8.23                     | 15.41                           | 81.06                           | 20                         | 6.67                                         |
| 7.2                                            | 8.27                     | 27.47                           | 72.47                           | 20                         | 5.94                                         |
| 7.3                                            | 8.25                     | 12.39                           | 84.86                           | 20                         | 6.05                                         |
| 7.4                                            | 8.35                     | 19.82                           | 87.09                           | 20                         | 6.31                                         |
| 7.5                                            | 8.47                     | 23.77                           | 88.55                           | 22                         | 6.67                                         |
| 8.0                                            | 8.75                     | 35.17                           | 98.32                           | 22                         | 6.50                                         |
| 8.1                                            | 8.68                     | 42.01                           | 89.78                           | 23                         | 6.61                                         |

**Explanations:**

basal end of the sample =&gt; section height: 0.0 mm

| Sample 1       |                          |                                 |                                 |
|----------------|--------------------------|---------------------------------|---------------------------------|
| Section height | Cross-sectional area $A$ | Axial second moment of area $I$ | Polar second moment of area $J$ |
| [mm]           | [mm <sup>2</sup> ]       | [mm <sup>4</sup> ]              | [mm <sup>4</sup> ]              |
| 0.0            | 11.37                    | 9.39                            | 20.75                           |
| 0.2            | 10.73                    | 8.46                            | 18.43                           |
| 0.4            | 10.72                    | 8.48                            | 18.41                           |
| 0.6            | 10.73                    | 8.63                            | 18.43                           |
| 0.8            | 10.98                    | 8.98                            | 19.30                           |
| 1.0            | 10.99                    | 8.96                            | 19.34                           |
| 1.2            | 11.03                    | 9.16                            | 19.50                           |
| 1.4            | 11.20                    | 9.57                            | 20.04                           |
| 1.6            | 11.47                    | 10.03                           | 21.04                           |
| 1.8            | 11.46                    | 10.00                           | 21.01                           |
| 2.0            | 11.74                    | 10.42                           | 22.06                           |
| 2.2            | 11.85                    | 10.76                           | 22.47                           |
| 2.4            | 12.26                    | 11.42                           | 24.06                           |
| 2.6            | 12.86                    | 12.54                           | 26.55                           |
| 2.8            | 13.30                    | 14.04                           | 28.36                           |
| 3.0            | 14.73                    | 16.90                           | 35.30                           |
| 3.2            | 15.71                    | 19.67                           | 40.25                           |
| 3.4            | 17.06                    | 23.40                           | 47.48                           |
| 3.6            | 18.30                    | 27.25                           | 54.85                           |
| 3.8            | 19.63                    | 31.33                           | 63.60                           |
| 4.0            | 21.12                    | 38.03                           | 74.63                           |
| 4.2            | 21.65                    | 42.00                           | 79.64                           |
| 4.4            | 23.33                    | 49.67                           | 94.21                           |
| 4.6            | 26.92                    | 71.24                           | 132.11                          |
| 4.8            | 27.82                    | 78.65                           | 144.80                          |
| 5.0            | 31.54                    | 106.36                          | 197.36                          |
| 5.2            | 34.77                    | 139.55                          | 256.18                          |
| 5.4            | 41.21                    | 216.32                          | 398.27                          |
| 5.6            | 45.08                    | 268.63                          | 503.56                          |
| 5.8            | 48.48                    | 328.53                          | 632.52                          |
| 6.0            | 47.69                    | 360.04                          | 687.50                          |

| Sample 2       |                          |                                 |                                 |
|----------------|--------------------------|---------------------------------|---------------------------------|
| Section height | Cross-sectional area $A$ | Axial second moment of area $I$ | Polar second moment of area $J$ |
| [mm]           | [mm <sup>2</sup> ]       | [mm <sup>4</sup> ]              | [mm <sup>4</sup> ]              |
| 0.0            | 8.80                     | 5.60                            | 12.50                           |
| 0.2            | 9.65                     | 7.93                            | 14.91                           |
| 0.4            | 8.49                     | 5.17                            | 11.57                           |
| 0.6            | 8.26                     | 5.16                            | 10.91                           |
| 0.8            | 8.38                     | 5.23                            | 11.25                           |
| 1.0            | 8.32                     | 5.19                            | 11.10                           |

| Sample 2 (continued) |                               |                                      |                                      |
|----------------------|-------------------------------|--------------------------------------|--------------------------------------|
| Section height       | Cross-sectional area <i>A</i> | Axial second moment of area <i>I</i> | Polar second moment of area <i>J</i> |
| [mm]                 | [mm <sup>2</sup> ]            | [mm <sup>4</sup> ]                   | [mm <sup>4</sup> ]                   |
| 1.2                  | 8.29                          | 5.10                                 | 11.00                                |
| 1.4                  | 8.28                          | 5.08                                 | 10.97                                |
| 1.6                  | 8.50                          | 5.29                                 | 11.58                                |
| 1.8                  | 8.13                          | 5.26                                 | 10.59                                |
| 2.0                  | 8.38                          | 5.15                                 | 11.30                                |
| 2.2                  | 8.69                          | 5.73                                 | 12.11                                |
| 2.4                  | 8.79                          | 6.10                                 | 12.41                                |
| 2.6                  | 8.87                          | 6.20                                 | 12.64                                |
| 2.8                  | 9.37                          | 6.75                                 | 14.11                                |
| 3.0                  | 10.60                         | 9.60                                 | 18.68                                |
| 3.2                  | 12.35                         | 13.48                                | 25.70                                |
| 3.4                  | 13.02                         | 15.83                                | 28.88                                |
| 3.6                  | 13.28                         | 14.68                                | 29.73                                |
| 3.8                  | 14.97                         | 22.22                                | 38.59                                |
| 4.0                  | 17.46                         | 32.47                                | 53.46                                |
| 4.2                  | 19.09                         | 40.66                                | 66.08                                |
| 4.4                  | 19.50                         | 46.52                                | 71.92                                |
| 4.6                  | 23.60                         | 74.07                                | 110.60                               |
| 4.8                  | 26.92                         | 100.50                               | 147.94                               |
| 5.0                  | 29.57                         | 125.39                               | 185.35                               |
| 5.2                  | 32.10                         | 158.18                               | 237.79                               |
| 5.4                  | 32.13                         | 194.58                               | 290.19                               |
| 5.6                  | 32.89                         | 233.64                               | 359.69                               |
| 5.8                  | 33.69                         | 265.36                               | 425.51                               |

| Sample 3       |                               |                                      |                                      |
|----------------|-------------------------------|--------------------------------------|--------------------------------------|
| Section height | Cross-sectional area <i>A</i> | Axial second moment of area <i>I</i> | Polar second moment of area <i>J</i> |
| [mm]           | [mm <sup>2</sup> ]            | [mm <sup>4</sup> ]                   | [mm <sup>4</sup> ]                   |
| 0.0            | 9.92                          | 8.92                                 | 16.61                                |
| 0.2            | 10.17                         | 7.98                                 | 16.51                                |
| 0.4            | 10.42                         | 8.64                                 | 17.39                                |
| 0.6            | 9.91                          | 7.35                                 | 15.68                                |
| 0.8            | 10.01                         | 7.61                                 | 16.04                                |
| 1.0            | 9.78                          | 7.27                                 | 15.27                                |
| 1.2            | 9.60                          | 7.07                                 | 14.70                                |
| 1.4            | 9.63                          | 6.91                                 | 14.83                                |
| 1.6            | 9.21                          | 6.53                                 | 13.56                                |
| 1.8            | 9.36                          | 6.57                                 | 14.03                                |
| 2.0            | 9.56                          | 6.80                                 | 14.68                                |
| 2.2            | 9.47                          | 6.62                                 | 14.36                                |
| 2.4            | 9.49                          | 6.76                                 | 14.40                                |

| Sample 3 (continued) |                          |                                 |                                 |
|----------------------|--------------------------|---------------------------------|---------------------------------|
| Section height       | Cross-sectional area $A$ | Axial second moment of area $I$ | Polar second moment of area $J$ |
| [mm]                 | [mm <sup>2</sup> ]       | [mm <sup>4</sup> ]              | [mm <sup>4</sup> ]              |
| 2.6                  | 9.28                     | 6.59                            | 13.79                           |
| 2.8                  | 9.19                     | 6.28                            | 13.53                           |
| 3.0                  | 9.22                     | 6.18                            | 13.65                           |
| 3.2                  | 8.89                     | 5.73                            | 12.70                           |
| 3.4                  | 8.88                     | 5.55                            | 12.72                           |
| 3.6                  | 9.30                     | 6.27                            | 13.90                           |
| 3.8                  | 9.34                     | 6.26                            | 14.03                           |
| 4.0                  | 9.24                     | 6.13                            | 13.78                           |
| 4.2                  | 9.59                     | 6.57                            | 14.87                           |
| 4.4                  | 9.93                     | 7.25                            | 15.87                           |
| 4.6                  | 10.15                    | 7.24                            | 16.69                           |
| 4.8                  | 10.67                    | 8.05                            | 18.49                           |
| 5.0                  | 11.42                    | 9.06                            | 21.34                           |
| 5.2                  | 12.83                    | 11.75                           | 27.04                           |
| 5.4                  | 13.91                    | 13.77                           | 31.96                           |
| 5.6                  | 13.90                    | 13.79                           | 31.93                           |
| 5.8                  | 19.40                    | 32.10                           | 65.08                           |
| 6.0                  | 20.67                    | 36.68                           | 74.72                           |
| 6.2                  | 23.98                    | 52.73                           | 105.27                          |
| 6.4                  | 25.80                    | 66.13                           | 128.32                          |
| 6.6                  | 28.43                    | 81.64                           | 164.07                          |
| 6.8                  | 32.71                    | 117.10                          | 229.03                          |
| 7.0                  | 36.65                    | 150.01                          | 303.54                          |
| 7.2                  | 43.31                    | 218.75                          | 458.07                          |
| 7.4                  | 43.25                    | 227.63                          | 527.47                          |
| 7.6                  | 47.30                    | 302.12                          | 650.47                          |
| 7.8                  | 47.80                    | 351.08                          | 762.28                          |

| Sample 4       |                          |                                 |                                 |
|----------------|--------------------------|---------------------------------|---------------------------------|
| Section height | Cross-sectional area $A$ | Axial second moment of area $I$ | Polar second moment of area $J$ |
| [mm]           | [mm <sup>2</sup> ]       | [mm <sup>4</sup> ]              | [mm <sup>4</sup> ]              |
| 0.0            | 8.80                     | 5.97                            | 12.38                           |
| 0.2            | 9.25                     | 6.01                            | 13.88                           |
| 0.4            | 9.42                     | 6.57                            | 14.27                           |
| 0.6            | 9.61                     | 6.83                            | 14.85                           |
| 0.8            | 9.06                     | 6.46                            | 13.13                           |
| 1.0            | 8.68                     | 5.55                            | 12.14                           |
| 1.2            | 8.95                     | 6.28                            | 12.85                           |
| 1.4            | 8.72                     | 6.06                            | 12.18                           |
| 1.6            | 8.98                     | 6.43                            | 12.93                           |
| 1.8            | 8.85                     | 6.06                            | 12.54                           |

| Sample 4 (continued) |                          |                                 |                                 |
|----------------------|--------------------------|---------------------------------|---------------------------------|
| Section height       | Cross-sectional area $A$ | Axial second moment of area $I$ | Polar second moment of area $J$ |
| [mm]                 | [mm <sup>2</sup> ]       | [mm <sup>4</sup> ]              | [mm <sup>4</sup> ]              |
| 2.0                  | 8.70                     | 5.87                            | 12.13                           |
| 2.2                  | 8.41                     | 5.43                            | 11.38                           |
| 2.4                  | 8.84                     | 5.92                            | 12.54                           |
| 2.6                  | 9.08                     | 6.46                            | 13.21                           |
| 2.8                  | 9.07                     | 6.43                            | 13.18                           |
| 3.0                  | 9.94                     | 7.86                            | 15.87                           |
| 3.2                  | 10.19                    | 8.19                            | 16.80                           |
| 3.4                  | 10.42                    | 8.46                            | 17.57                           |
| 3.6                  | 12.05                    | 11.36                           | 23.94                           |
| 3.8                  | 12.63                    | 12.71                           | 26.28                           |
| 4.0                  | 13.40                    | 15.26                           | 29.53                           |
| 4.2                  | 14.13                    | 18.05                           | 32.94                           |
| 4.4                  | 14.74                    | 19.57                           | 35.98                           |
| 4.6                  | 15.89                    | 23.53                           | 42.38                           |
| 4.8                  | 17.75                    | 30.17                           | 54.60                           |
| 5.0                  | 19.24                    | 37.05                           | 65.46                           |
| 5.2                  | 21.12                    | 46.28                           | 81.79                           |
| 5.4                  | 24.69                    | 67.67                           | 119.54                          |
| 5.6                  | 26.57                    | 80.41                           | 141.58                          |
| 5.8                  | 30.68                    | 110.08                          | 198.24                          |
| 6.0                  | 32.01                    | 138.37                          | 252.41                          |
| 6.2                  | 32.49                    | 165.70                          | 308.18                          |
| 6.4                  | 33.55                    | 207.90                          | 398.78                          |
| 6.6                  | 34.20                    | 233.21                          | 442.33                          |
| 6.8                  | 36.01                    | 290.02                          | 567.27                          |
| 7.0                  | 36.55                    | 320.49                          | 648.70                          |

| Sample 5       |                          |                                 |                                 |
|----------------|--------------------------|---------------------------------|---------------------------------|
| Section height | Cross-sectional area $A$ | Axial second moment of area $I$ | Polar second moment of area $J$ |
| [mm]           | [mm <sup>2</sup> ]       | [mm <sup>4</sup> ]              | [mm <sup>4</sup> ]              |
| 0.0            | 6.13                     | 3.01                            | 6.00                            |
| 0.2            | 6.62                     | 3.56                            | 6.99                            |
| 0.4            | 6.15                     | 3.04                            | 6.02                            |
| 0.6            | 6.05                     | 2.99                            | 5.83                            |
| 0.8            | 5.94                     | 2.77                            | 5.62                            |
| 1.0            | 5.85                     | 2.70                            | 5.45                            |
| 1.2            | 5.63                     | 2.44                            | 5.06                            |
| 1.4            | 5.76                     | 2.58                            | 5.29                            |
| 1.6            | 5.55                     | 2.38                            | 4.90                            |
| 1.8            | 5.69                     | 2.54                            | 5.16                            |
| 2.0            | 5.69                     | 2.51                            | 5.16                            |

| Sample 5 (continued) |                          |                                 |                                 |
|----------------------|--------------------------|---------------------------------|---------------------------------|
| Section height       | Cross-sectional area $A$ | Axial second moment of area $I$ | Polar second moment of area $J$ |
| [mm]                 | [mm <sup>2</sup> ]       | [mm <sup>4</sup> ]              | [mm <sup>4</sup> ]              |
| 2.2                  | 5.75                     | 2.62                            | 5.28                            |
| 2.4                  | 5.83                     | 2.69                            | 5.42                            |
| 2.6                  | 5.86                     | 2.70                            | 5.47                            |
| 2.8                  | 5.90                     | 2.73                            | 5.56                            |
| 3.0                  | 6.08                     | 2.96                            | 5.90                            |
| 3.2                  | 6.30                     | 3.19                            | 6.35                            |
| 3.4                  | 6.49                     | 3.48                            | 6.75                            |
| 3.6                  | 7.15                     | 4.47                            | 8.24                            |
| 3.8                  | 8.48                     | 6.86                            | 11.89                           |
| 4.0                  | 10.17                    | 11.90                           | 18.10                           |
| 4.2                  | 11.04                    | 16.51                           | 23.11                           |
| 4.4                  | 14.04                    | 32.06                           | 41.45                           |
| 4.6                  | 17.61                    | 58.36                           | 72.39                           |
| 4.8                  | 18.74                    | 63.03                           | 79.70                           |
| 5.0                  | 24.53                    | 111.74                          | 143.59                          |
| 5.2                  | 28.22                    | 134.60                          | 182.40                          |
| 5.4                  | 31.12                    | 149.92                          | 211.85                          |
| 5.6                  | 29.13                    | 160.79                          | 250.54                          |
| 5.8                  | 36.68                    | 274.21                          | 424.19                          |

| Sample 6 (detailed serial section) |                          |                                 |                                 |                            |                                              |
|------------------------------------|--------------------------|---------------------------------|---------------------------------|----------------------------|----------------------------------------------|
| Section height                     | Cross-sectional area $A$ | Axial second moment of area $I$ | Polar second moment of area $J$ | Number of vascular bundles | Area fraction of the vascular bundles $AF_v$ |
| [mm]                               | [mm <sup>2</sup> ]       | [mm <sup>4</sup> ]              | [mm <sup>4</sup> ]              | [-]                        | [%]                                          |
| 0.0                                | 6.74                     | 3.20                            | 7.31                            | 75.00                      | 5.38                                         |
| 0.1                                | 6.89                     | 3.39                            | 7.64                            | 74.00                      | 3.96                                         |
| 0.2                                | 6.87                     | 3.34                            | 7.61                            | 72.00                      | 3.27                                         |
| 0.3                                | 6.89                     | 3.36                            | 7.64                            | 74.00                      | 3.58                                         |
| 0.4                                | 6.95                     | 3.46                            | 7.79                            | 74.00                      | 3.37                                         |
| 0.5                                | 6.90                     | 3.39                            | 7.66                            | 75.00                      | 3.79                                         |
| 0.6                                | 6.94                     | 3.42                            | 7.76                            | 77.00                      | 3.76                                         |
| 0.7                                | 6.78                     | 3.23                            | 7.42                            | 75.00                      | 4.36                                         |
| 0.8                                | 6.97                     | 3.48                            | 7.82                            | 74.00                      | 4.29                                         |
| 0.9                                | 6.81                     | 3.29                            | 7.47                            | 76.00                      | 4.32                                         |
| 1.0                                | 6.87                     | 3.34                            | 7.61                            | 79.00                      | 4.59                                         |
| 1.1                                | 6.84                     | 3.33                            | 7.52                            | 73.00                      | 4.66                                         |
| 1.2                                | 6.86                     | 3.30                            | 7.59                            | 80.00                      | 4.06                                         |
| 1.3                                | 6.83                     | 3.33                            | 7.52                            | 77.00                      | 4.72                                         |
| 1.4                                | 6.92                     | 3.40                            | 7.72                            | 78.00                      | 5.28                                         |
| 1.5                                | 6.90                     | 3.36                            | 7.67                            | 73.00                      | 5.22                                         |
| 1.6                                | 6.71                     | 3.10                            | 7.28                            | 76.00                      | 5.22                                         |
| 1.7                                | 6.94                     | 3.37                            | 7.77                            | 73.00                      | 4.75                                         |



| Sample 6 (detailed serial section) (continued) |                          |                                 |                                 |                            |                                              |
|------------------------------------------------|--------------------------|---------------------------------|---------------------------------|----------------------------|----------------------------------------------|
| Section height                                 | Cross-sectional area $A$ | Axial second moment of area $I$ | Polar second moment of area $J$ | Number of vascular bundles | Area fraction of the vascular bundles $AF_v$ |
| [mm]                                           | [mm <sup>2</sup> ]       | [mm <sup>4</sup> ]              | [mm <sup>4</sup> ]              | [-]                        | [%]                                          |
| 1.8                                            | 6.64                     | 2.89                            | 7.20                            | 77.00                      | 4.49                                         |
| 1.9                                            | 7.05                     | 3.01                            | 8.26                            | 71.00                      | 4.88                                         |
| 2.0                                            | 6.87                     | 2.96                            | 7.79                            | 78.00                      | 4.99                                         |
| 2.2                                            | 6.95                     | 3.03                            | 7.97                            | 76.00                      | 5.41                                         |
| 2.3                                            | 6.89                     | 2.97                            | 7.84                            | 71.00                      | 5.89                                         |
| 2.4                                            | 6.80                     | 2.91                            | 7.62                            | 75.00                      | 5.83                                         |
| 2.5                                            | 6.97                     | 3.02                            | 8.03                            | 75.00                      | 5.52                                         |
| 2.6                                            | 7.07                     | 3.10                            | 8.29                            | 72.00                      | 5.24                                         |
| 2.7                                            | 7.03                     | 3.04                            | 8.19                            | 72.00                      | 5.45                                         |
| 2.8                                            | 7.08                     | 3.15                            | 8.26                            | 71.00                      | 6.02                                         |
| 2.9                                            | 7.10                     | 3.13                            | 8.32                            | 72.00                      | 5.93                                         |
| 3.0                                            | 7.04                     | 3.12                            | 8.16                            | 73.00                      | 5.71                                         |
| 3.1                                            | 7.04                     | 3.08                            | 8.19                            | 70.00                      | 5.60                                         |
| 3.2                                            | 7.14                     | 3.06                            | 8.50                            | 69.00                      | 6.00                                         |
| 3.4                                            | 7.16                     | 3.16                            | 8.49                            | 69.00                      | 6.00                                         |
| 3.5                                            | 7.18                     | 3.26                            | 8.48                            | 69.00                      | 5.78                                         |
| 3.6                                            | 7.12                     | 3.18                            | 8.39                            | 67.00                      | 5.69                                         |
| 3.7                                            | 7.16                     | 3.20                            | 8.46                            | 68.00                      | 5.53                                         |
| 3.8                                            | 7.19                     | 3.25                            | 8.50                            | 66.00                      | 5.60                                         |
| 3.9                                            | 7.31                     | 3.38                            | 8.81                            | 66.00                      | 4.89                                         |
| 4.0                                            | 7.41                     | 3.47                            | 9.06                            | 68.00                      | 5.02                                         |
| 4.1                                            | 7.56                     | 3.60                            | 9.43                            | 68.00                      | 4.95                                         |
| 4.2                                            | 7.68                     | 3.74                            | 9.73                            | 71.00                      | 4.99                                         |
| 4.3                                            | 7.72                     | 3.82                            | 9.85                            | 67.00                      | 4.58                                         |
| 4.4                                            | 7.85                     | 3.94                            | 10.19                           | 69.00                      | 4.77                                         |
| 4.5                                            | 8.13                     | 4.24                            | 10.94                           | 69.00                      | 4.50                                         |
| 4.6                                            | 8.39                     | 4.55                            | 11.65                           | 71.00                      | 4.38                                         |
| 4.7                                            | 8.43                     | 4.74                            | 11.72                           | 69.00                      | 3.99                                         |
| 4.8                                            | 8.59                     | 5.11                            | 12.11                           | 68.00                      | 4.07                                         |
| 4.9                                            | 9.05                     | 5.77                            | 13.41                           | 68.00                      | 4.34                                         |
| 5.0                                            | 9.37                     | 6.35                            | 14.33                           | 69.00                      | 3.79                                         |
| 5.1                                            | 9.58                     | 6.78                            | 15.06                           | 70.00                      | 3.74                                         |
| 5.3                                            | 10.60                    | 8.76                            | 18.50                           | 73.00                      | 3.05                                         |
| 5.6                                            | 16.23                    | 31.84                           | 48.89                           | 86.00                      | 2.85                                         |
| 5.7                                            | 17.31                    | 37.50                           | 56.60                           | 89.00                      | 2.63                                         |
| 5.8                                            | 18.11                    | 42.08                           | 63.13                           | 90.00                      | 2.68                                         |
| 5.9                                            | 19.50                    | 50.83                           | 74.80                           | 97.00                      | 2.82                                         |
| 6.0                                            | 20.55                    | 56.89                           | 84.02                           | 99.00                      | 2.79                                         |
| 6.2                                            | 22.90                    | 74.18                           | 107.92                          | 97.00                      | 2.76                                         |
| 6.3                                            | 24.68                    | 85.85                           | 125.38                          | 99.00                      | 3.92                                         |
| 6.4                                            | 25.18                    | 93.69                           | 135.33                          | 108.00                     | 2.87                                         |
| 6.5                                            | 27.03                    | 114.91                          | 163.94                          | 118.00                     | 2.82                                         |
| 6.6                                            | 27.66                    | 117.68                          | 174.27                          | 121.00                     | 2.77                                         |
| 6.7                                            | 28.07                    | 136.44                          | 199.60                          | 132.00                     | 3.12                                         |

| Sample 6 (detailed serial section) (continued) |                          |                                 |                                 |                            |                                              |
|------------------------------------------------|--------------------------|---------------------------------|---------------------------------|----------------------------|----------------------------------------------|
| Section height                                 | Cross-sectional area $A$ | Axial second moment of area $I$ | Polar second moment of area $J$ | Number of vascular bundles | Area fraction of the vascular bundles $AF_v$ |
| [mm]                                           | [mm <sup>2</sup> ]       | [mm <sup>4</sup> ]              | [mm <sup>4</sup> ]              | [-]                        | [%]                                          |
| 6.8                                            | 28.77                    | 146.73                          | 219.34                          | 125.00                     | 3.72                                         |
| 6.9                                            | 28.88                    | 165.65                          | 245.66                          | 125.00                     | 3.09                                         |

**Explanations:**

basal end of the sample => section height: 0.0 mm

| Sample 1       |                               |                                      |                                      |
|----------------|-------------------------------|--------------------------------------|--------------------------------------|
| Section height | Cross-sectional area <i>A</i> | Axial second moment of area <i>I</i> | Polar second moment of area <i>J</i> |
| [mm]           | [mm <sup>2</sup> ]            | [mm <sup>4</sup> ]                   | [mm <sup>4</sup> ]                   |
| 0.0            | 1.50                          | 0.13                                 | 0.40                                 |
| 0.2            | 2.91                          | 0.52                                 | 1.42                                 |
| 0.4            | 3.07                          | 0.59                                 | 1.58                                 |
| 0.6            | 3.04                          | 0.54                                 | 1.58                                 |
| 0.8            | 3.11                          | 0.68                                 | 1.57                                 |
| 1.0            | 2.65                          | 0.44                                 | 1.18                                 |
| 1.2            | 1.75                          | 0.17                                 | 0.54                                 |
| 1.4            | 1.93                          | 0.22                                 | 0.63                                 |
| 1.6            | 2.83                          | 0.42                                 | 1.41                                 |
| 1.8            | 2.51                          | 0.37                                 | 1.08                                 |
| 2.0            | 1.80                          | 0.18                                 | 0.56                                 |
| 2.2            | 1.92                          | 0.20                                 | 0.65                                 |
| 2.4            | 1.87                          | 0.19                                 | 0.60                                 |
| 2.6            | 2.03                          | 0.22                                 | 0.72                                 |
| 2.8            | 2.19                          | 0.27                                 | 0.84                                 |
| 3.0            | 1.79                          | 0.18                                 | 0.55                                 |
| 3.2            | 2.20                          | 0.25                                 | 0.87                                 |
| 3.4            | 2.65                          | 0.36                                 | 1.35                                 |
| 3.6            | 3.02                          | 0.57                                 | 1.61                                 |
| 3.8            | 3.52                          | 0.91                                 | 2.04                                 |
| 4.0            | 12.87                         | 45.78                                | 191.85                               |

| Sample 2       |                               |                                      |                                      |
|----------------|-------------------------------|--------------------------------------|--------------------------------------|
| Section height | Cross-sectional area <i>A</i> | Axial second moment of area <i>I</i> | Polar second moment of area <i>J</i> |
| [mm]           | [mm <sup>2</sup> ]            | [mm <sup>4</sup> ]                   | [mm <sup>4</sup> ]                   |
| 0.0            | 3.03                          | 0.69                                 | 1.50                                 |
| 0.2            | 3.22                          | 0.78                                 | 1.67                                 |
| 0.4            | 3.07                          | 0.67                                 | 1.52                                 |
| 0.6            | 3.06                          | 0.67                                 | 1.51                                 |
| 0.8            | 2.45                          | 0.40                                 | 0.99                                 |
| 1.0            | 2.85                          | 0.53                                 | 1.34                                 |
| 1.2            | 2.13                          | 0.26                                 | 0.79                                 |
| 1.4            | 2.38                          | 0.34                                 | 0.96                                 |
| 1.6            | 2.76                          | 0.49                                 | 1.26                                 |
| 1.8            | 2.56                          | 0.40                                 | 1.10                                 |
| 2.0            | 2.57                          | 0.37                                 | 1.15                                 |
| 2.2            | 2.85                          | 0.52                                 | 1.35                                 |
| 2.4            | 2.84                          | 0.51                                 | 1.32                                 |
| 2.6            | 2.94                          | 0.55                                 | 1.43                                 |
| 2.8            | 2.78                          | 0.47                                 | 1.36                                 |
| 3.0            | 3.06                          | 0.59                                 | 1.55                                 |

| Sample 2 (continued) |                               |                                      |                                      |
|----------------------|-------------------------------|--------------------------------------|--------------------------------------|
| Section height       | Cross-sectional area <i>A</i> | Axial second moment of area <i>I</i> | Polar second moment of area <i>J</i> |
| [mm]                 | [mm <sup>2</sup> ]            | [mm <sup>4</sup> ]                   | [mm <sup>4</sup> ]                   |
| 3.2                  | 6.42                          | 4.58                                 | 65.56                                |
| 3.4                  | 11.56                         | 22.11                                | 218.84                               |

| Sample 3       |                               |                                      |                                      |
|----------------|-------------------------------|--------------------------------------|--------------------------------------|
| Section height | Cross-sectional area <i>A</i> | Axial second moment of area <i>I</i> | Polar second moment of area <i>J</i> |
| [mm]           | [mm <sup>2</sup> ]            | [mm <sup>4</sup> ]                   | [mm <sup>4</sup> ]                   |
| 0.0            | 1.96                          | 0.24                                 | 0.65                                 |
| 0.2            | 1.75                          | 0.20                                 | 0.51                                 |
| 0.4            | 1.65                          | 0.17                                 | 0.46                                 |
| 0.6            | 1.98                          | 0.30                                 | 0.67                                 |
| 0.8            | 2.14                          | 0.32                                 | 0.75                                 |
| 1.0            | 1.50                          | 0.15                                 | 0.38                                 |
| 1.2            | 1.09                          | 0.07                                 | 0.21                                 |
| 1.4            | 2.13                          | 0.32                                 | 0.79                                 |
| 1.6            | 1.53                          | 0.17                                 | 0.40                                 |
| 1.8            | 1.82                          | 0.17                                 | 0.60                                 |
| 2.0            | 1.31                          | 0.10                                 | 0.29                                 |
| 2.2            | 2.31                          | 0.38                                 | 0.88                                 |
| 2.4            | 2.01                          | 0.24                                 | 0.69                                 |
| 2.6            | 2.16                          | 0.33                                 | 0.76                                 |
| 2.8            | 1.95                          | 0.28                                 | 0.64                                 |
| 3.0            | 2.14                          | 0.29                                 | 0.83                                 |
| 3.2            | 1.99                          | 0.26                                 | 0.66                                 |
| 3.4            | 1.74                          | 0.20                                 | 0.50                                 |
| 3.6            | 1.20                          | 0.07                                 | 0.26                                 |
| 3.8            | 1.47                          | 0.13                                 | 0.39                                 |
| 4.0            | 1.86                          | 0.18                                 | 0.62                                 |
| 4.2            | 2.08                          | 0.29                                 | 0.71                                 |
| 4.4            | 1.88                          | 0.22                                 | 0.60                                 |
| 4.6            | 2.09                          | 0.29                                 | 0.73                                 |
| 4.8            | 4.97                          | 19.42                                | 46.46                                |
| 5.0            | 5.37                          | 28.05                                | 74.51                                |
| 5.2            | 8.58                          | 32.16                                | 236.93                               |

| Sample 4       |                               |                                      |                                      |
|----------------|-------------------------------|--------------------------------------|--------------------------------------|
| Section height | Cross-sectional area <i>A</i> | Axial second moment of area <i>I</i> | Polar second moment of area <i>J</i> |
| [mm]           | [mm <sup>2</sup> ]            | [mm <sup>4</sup> ]                   | [mm <sup>4</sup> ]                   |
| 0.0            | 2.10                          | 0.27                                 | 0.73                                 |

| Sample 4 (continued) |                               |                                      |                                      |
|----------------------|-------------------------------|--------------------------------------|--------------------------------------|
| Section height       | Cross-sectional area <i>A</i> | Axial second moment of area <i>I</i> | Polar second moment of area <i>J</i> |
| [mm]                 | [mm <sup>2</sup> ]            | [mm <sup>4</sup> ]                   | [mm <sup>4</sup> ]                   |
| 0.2                  | 2.45                          | 0.42                                 | 0.97                                 |
| 0.4                  | 2.40                          | 0.40                                 | 0.93                                 |
| 0.6                  | 2.34                          | 0.37                                 | 0.89                                 |
| 0.8                  | 2.36                          | 0.39                                 | 0.91                                 |
| 1.0                  | 2.28                          | 0.34                                 | 0.85                                 |
| 1.2                  | 2.19                          | 0.34                                 | 0.78                                 |
| 1.4                  | 2.08                          | 0.32                                 | 0.70                                 |
| 1.6                  | 2.35                          | 0.37                                 | 0.90                                 |
| 1.8                  | 2.13                          | 0.28                                 | 0.76                                 |
| 2.0                  | 2.31                          | 0.37                                 | 0.87                                 |
| 2.2                  | 2.24                          | 0.33                                 | 0.82                                 |
| 2.4                  | 1.96                          | 0.25                                 | 0.63                                 |
| 2.6                  | 2.38                          | 0.40                                 | 0.92                                 |
| 2.8                  | 2.14                          | 0.32                                 | 0.75                                 |
| 3.0                  | 2.13                          | 0.28                                 | 0.78                                 |
| 3.2                  | 2.44                          | 0.47                                 | 0.97                                 |
| 3.4                  | 2.04                          | 0.27                                 | 0.69                                 |
| 3.6                  | 2.05                          | 0.27                                 | 0.68                                 |
| 3.8                  | 2.26                          | 0.35                                 | 0.84                                 |
| 4.0                  | 2.11                          | 0.31                                 | 0.73                                 |
| 4.2                  | 5.48                          | 8.03                                 | 51.41                                |
| 4.4                  | 7.93                          | 5.69                                 | 155.70                               |

| Sample 5       |                               |                                      |                                      |
|----------------|-------------------------------|--------------------------------------|--------------------------------------|
| Section height | Cross-sectional area <i>A</i> | Axial second moment of area <i>I</i> | Polar second moment of area <i>J</i> |
| [mm]           | [mm <sup>2</sup> ]            | [mm <sup>4</sup> ]                   | [mm <sup>4</sup> ]                   |
| 0.0            | 5.17                          | 1.63                                 | 4.44                                 |
| 0.2            | 5.14                          | 1.61                                 | 4.42                                 |
| 0.4            | 5.30                          | 1.77                                 | 4.65                                 |
| 0.6            | 5.26                          | 1.91                                 | 4.60                                 |
| 0.8            | 5.35                          | 1.82                                 | 4.72                                 |
| 1.0            | 5.32                          | 1.97                                 | 4.64                                 |
| 1.2            | 5.41                          | 1.93                                 | 4.94                                 |
| 1.4            | 5.03                          | 1.63                                 | 4.23                                 |
| 1.6            | 5.83                          | 2.13                                 | 5.83                                 |
| 1.8            | 5.17                          | 1.61                                 | 4.55                                 |
| 2.0            | 5.05                          | 1.73                                 | 4.20                                 |
| 2.2            | 5.49                          | 1.91                                 | 5.14                                 |
| 2.4            | 5.35                          | 1.79                                 | 4.87                                 |
| 2.6            | 5.33                          | 1.93                                 | 4.79                                 |
| 2.8            | 5.73                          | 2.14                                 | 5.87                                 |

| Sample 5 (continued) |                          |                                 |                                 |
|----------------------|--------------------------|---------------------------------|---------------------------------|
| Section height       | Cross-sectional area $A$ | Axial second moment of area $I$ | Polar second moment of area $J$ |
| [mm]                 | [mm <sup>2</sup> ]       | [mm <sup>4</sup> ]              | [mm <sup>4</sup> ]              |
| 3.0                  | 5.37                     | 1.95                            | 5.17                            |
| 3.2                  | 5.82                     | 2.79                            | 7.97                            |
| 3.4                  | 6.14                     | 3.28                            | 7.83                            |
| 3.6                  | 9.24                     | 21.44                           | 35.52                           |
| 3.8                  | 13.15                    | 61.87                           | 141.91                          |
| 4.0                  | 17.47                    | 148.50                          | 307.17                          |

| Sample 6 (detailed serial section) |                          |                                 |                                 |                            |                                              |
|------------------------------------|--------------------------|---------------------------------|---------------------------------|----------------------------|----------------------------------------------|
| Section height                     | Cross-sectional area $A$ | Axial second moment of area $I$ | Polar second moment of area $J$ | Number of vascular bundles | Area fraction of the vascular bundles $AF_v$ |
| [mm]                               | [mm <sup>2</sup> ]       | [mm <sup>4</sup> ]              | [mm <sup>4</sup> ]              | [-]                        | [%]                                          |
| 0.0                                | 2.35                     | 0.38                            | 0.90                            | 26.00                      | 1.41                                         |
| 0.1                                | 2.35                     | 0.37                            | 0.90                            | 26.00                      | 1.41                                         |
| 0.4                                | 2.35                     | 0.37                            | 0.90                            | 28.00                      | 1.54                                         |
| 0.5                                | 2.38                     | 0.38                            | 0.92                            | 28.00                      | 1.50                                         |
| 0.6                                | 2.33                     | 0.34                            | 0.89                            | 27.00                      | 1.48                                         |
| 0.7                                | 2.31                     | 0.35                            | 0.88                            | 27.00                      | 1.51                                         |
| 0.8                                | 2.36                     | 0.37                            | 0.91                            | 26.00                      | 1.63                                         |
| 0.9                                | 2.31                     | 0.35                            | 0.87                            | 29.00                      | 1.62                                         |
| 1.0                                | 2.38                     | 0.38                            | 0.92                            | 29.00                      | 1.56                                         |
| 1.1                                | 2.39                     | 0.38                            | 0.93                            | 31.00                      | 1.48                                         |
| 1.2                                | 2.38                     | 0.37                            | 0.93                            | 28.00                      | 1.62                                         |
| 1.3                                | 2.28                     | 0.36                            | 0.85                            | 29.00                      | 1.56                                         |
| 1.6                                | 1.94                     | 0.26                            | 0.61                            | 28.00                      | 1.71                                         |
| 1.8                                | 2.31                     | 0.34                            | 0.87                            | 29.00                      | 1.58                                         |
| 1.9                                | 2.45                     | 0.40                            | 0.98                            | 28.00                      | 1.48                                         |
| 2.0                                | 2.37                     | 0.37                            | 0.92                            | 31.00                      | 1.53                                         |
| 2.1                                | 2.38                     | 0.37                            | 0.93                            | 30.00                      | 1.57                                         |
| 2.2                                | 2.44                     | 0.40                            | 0.98                            | 33.00                      | 1.72                                         |
| 2.3                                | 2.39                     | 0.39                            | 0.93                            | 34.00                      | 1.62                                         |
| 2.4                                | 2.43                     | 0.38                            | 0.97                            | 34.00                      | 1.49                                         |
| 2.5                                | 2.43                     | 0.40                            | 0.97                            | 35.00                      | 1.35                                         |
| 2.6                                | 2.52                     | 0.41                            | 1.05                            | 36.00                      | 1.57                                         |
| 2.7                                | 2.44                     | 0.39                            | 0.98                            | 34.00                      | 1.71                                         |
| 2.8                                | 2.43                     | 0.40                            | 0.97                            | 35.00                      | 1.50                                         |
| 3.0                                | 2.52                     | 0.42                            | 1.04                            | 36.00                      | 1.66                                         |
| 3.1                                | 2.47                     | 0.40                            | 1.00                            | 36.00                      | 1.40                                         |
| 3.2                                | 2.41                     | 0.38                            | 0.96                            | 36.00                      | 1.70                                         |
| 3.3                                | 2.49                     | 0.41                            | 1.02                            | 39.00                      | 1.62                                         |
| 3.4                                | 2.51                     | 0.42                            | 1.05                            | 40.00                      | 1.73                                         |
| 3.5                                | 2.53                     | 0.42                            | 1.07                            | 40.00                      | 1.66                                         |
| 3.6                                | 2.53                     | 0.41                            | 1.07                            | 39.00                      | 1.69                                         |

| Sample 6 (detailed serial section) (continued) |                          |                                 |                                 |                            |                                              |
|------------------------------------------------|--------------------------|---------------------------------|---------------------------------|----------------------------|----------------------------------------------|
| Section height                                 | Cross-sectional area $A$ | Axial second moment of area $I$ | Polar second moment of area $J$ | Number of vascular bundles | Area fraction of the vascular bundles $AF_v$ |
| [mm]                                           | [mm <sup>2</sup> ]       | [mm <sup>4</sup> ]              | [mm <sup>4</sup> ]              | [-]                        | [%]                                          |
| 3.7                                            | 2.52                     | 0.40                            | 1.07                            | 38.00                      | 1.58                                         |
| 3.8                                            | 2.53                     | 0.42                            | 1.08                            | 37.00                      | 1.66                                         |
| 3.9                                            | 2.60                     | 0.44                            | 1.15                            | 41.00                      | 1.55                                         |
| 4.0                                            | 2.61                     | 0.44                            | 1.16                            | 38.00                      | 1.62                                         |
| 4.1                                            | 2.65                     | 0.45                            | 1.20                            | 41.00                      | 1.57                                         |
| 4.2                                            | 2.62                     | 0.43                            | 1.18                            | 42.00                      | 1.62                                         |
| 4.3                                            | 2.63                     | 0.45                            | 1.21                            | 45.00                      | 1.52                                         |
| 4.4                                            | 2.71                     | 0.48                            | 1.29                            | 43.00                      | 1.66                                         |
| 4.5                                            | 2.72                     | 0.47                            | 1.32                            | 43.00                      | 1.57                                         |
| 4.6                                            | 2.82                     | 0.52                            | 1.44                            | 42.00                      | 1.54                                         |
| 4.7                                            | 2.86                     | 0.54                            | 1.51                            | 43.00                      | 1.43                                         |
| 4.9                                            | 2.92                     | 0.59                            | 1.62                            | 40.00                      | 1.43                                         |
| 5.0                                            | 3.01                     | 0.65                            | 1.80                            | 41.00                      | 1.41                                         |
| 5.1                                            | 3.15                     | 0.74                            | 1.99                            | 41.00                      | 1.41                                         |
| 5.2                                            | 3.24                     | 0.83                            | 2.22                            | 40.00                      | 1.31                                         |
| 5.3                                            | 3.54                     | 1.12                            | 2.72                            | 42.00                      | 1.19                                         |
| 5.4                                            | 3.69                     | 1.38                            | 3.20                            | 43.00                      | 1.32                                         |
| 5.5                                            | 3.93                     | 1.78                            | 4.05                            | 44.00                      | 1.26                                         |
| 5.6                                            | 4.72                     | 4.49                            | 7.82                            | 43.00                      | 1.91                                         |
| 5.7                                            | 5.23                     | 7.17                            | 11.09                           | 45.00                      | 1.29                                         |
| 5.8                                            | 5.64                     | 8.99                            | 15.30                           | 44.00                      | 1.11                                         |
| 5.9                                            | 5.81                     | 9.55                            | 16.19                           | 43.00                      | 1.60                                         |
| 6.0                                            | 6.26                     | 14.67                           | 22.64                           | 43.00                      | 1.65                                         |
| 6.1                                            | 6.95                     | 17.22                           | 28.50                           | 49.00                      | 1.10                                         |

**Explanations:**

basal end of the sample =&gt; section height: 0.0 mm

| Sample 1       |                          |                                 |                                 |
|----------------|--------------------------|---------------------------------|---------------------------------|
| Section height | Cross-sectional area $A$ | Axial second moment of area $I$ | Polar second moment of area $J$ |
| [mm]           | [mm <sup>2</sup> ]       | [mm <sup>4</sup> ]              | [mm <sup>4</sup> ]              |
| 0.0            | 5.04                     | 2.00                            | 4.05                            |
| 0.2            | 5.12                     | 2.09                            | 4.18                            |
| 0.4            | 5.30                     | 2.23                            | 4.47                            |
| 0.6            | 5.28                     | 2.20                            | 4.45                            |
| 0.8            | 5.44                     | 2.36                            | 4.72                            |
| 1.0            | 5.46                     | 2.36                            | 4.77                            |
| 1.2            | 5.45                     | 2.37                            | 4.75                            |
| 1.4            | 5.45                     | 2.35                            | 4.75                            |
| 1.6            | 5.17                     | 2.07                            | 4.43                            |
| 1.8            | 5.51                     | 2.37                            | 4.85                            |
| 2.0            | 5.58                     | 2.48                            | 5.01                            |
| 2.2            | 5.58                     | 2.52                            | 5.02                            |
| 2.4            | 5.70                     | 2.59                            | 5.26                            |
| 2.6            | 5.57                     | 2.52                            | 5.16                            |
| 2.8            | 5.89                     | 2.92                            | 5.62                            |
| 3.0            | 5.77                     | 2.66                            | 5.35                            |
| 3.2            | 5.18                     | 2.09                            | 4.34                            |
| 3.4            | 6.04                     | 3.31                            | 5.95                            |
| 3.6            | 5.57                     | 2.84                            | 5.05                            |
| 3.8            | 5.88                     | 3.20                            | 5.59                            |
| 4.0            | 5.67                     | 2.84                            | 5.23                            |
| 4.2            | 6.22                     | 3.53                            | 6.34                            |
| 4.4            | 6.72                     | 4.20                            | 7.29                            |
| 4.6            | 7.38                     | 4.79                            | 8.74                            |
| 4.8            | 7.80                     | 5.05                            | 9.75                            |
| 5.0            | 10.59                    | 8.22                            | 18.16                           |
| 5.2            | 15.19                    | 15.24                           | 39.80                           |
| 5.4            | 28.83                    | 52.91                           | 142.54                          |

| Sample 2       |                          |                                 |                                 |
|----------------|--------------------------|---------------------------------|---------------------------------|
| Section height | Cross-sectional area $A$ | Axial second moment of area $I$ | Polar second moment of area $J$ |
| [mm]           | [mm <sup>2</sup> ]       | [mm <sup>4</sup> ]              | [mm <sup>4</sup> ]              |
| 0.0            | 4.18                     | 1.16                            | 2.83                            |
| 0.2            | 4.36                     | 1.23                            | 3.12                            |
| 0.4            | 4.45                     | 1.15                            | 4.41                            |
| 0.6            | 4.42                     | 1.40                            | 3.14                            |
| 0.8            | 4.21                     | 1.25                            | 2.85                            |
| 1.0            | 3.52                     | 0.92                            | 2.09                            |
| 1.2            | 4.33                     | 1.30                            | 3.04                            |
| 1.4            | 4.29                     | 1.42                            | 2.99                            |
| 1.6            | 4.45                     | 1.46                            | 3.21                            |



| Sample 2 (continued) |                               |                                      |                                      |
|----------------------|-------------------------------|--------------------------------------|--------------------------------------|
| Section height       | Cross-sectional area <i>A</i> | Axial second moment of area <i>I</i> | Polar second moment of area <i>J</i> |
| [mm]                 | [mm <sup>2</sup> ]            | [mm <sup>4</sup> ]                   | [mm <sup>4</sup> ]                   |
| 1.8                  | 4.39                          | 1.35                                 | 3.14                                 |
| 2.0                  | 4.35                          | 1.32                                 | 3.05                                 |
| 2.2                  | 4.34                          | 1.37                                 | 3.02                                 |
| 2.4                  | 4.36                          | 1.34                                 | 3.05                                 |
| 2.6                  | 4.45                          | 1.47                                 | 3.19                                 |
| 2.8                  | 4.37                          | 1.37                                 | 3.08                                 |
| 3.0                  | 4.39                          | 1.43                                 | 3.10                                 |
| 3.2                  | 4.39                          | 1.39                                 | 3.10                                 |
| 3.4                  | 4.29                          | 1.38                                 | 2.94                                 |
| 3.6                  | 4.24                          | 1.35                                 | 2.88                                 |
| 3.8                  | 4.26                          | 1.34                                 | 2.92                                 |
| 4.0                  | 4.49                          | 1.46                                 | 3.23                                 |
| 4.2                  | 4.52                          | 1.50                                 | 3.27                                 |
| 4.4                  | 4.65                          | 1.52                                 | 3.47                                 |
| 4.6                  | 5.05                          | 1.66                                 | 4.18                                 |
| 4.8                  | 5.29                          | 1.78                                 | 4.60                                 |
| 5.0                  | 6.22                          | 2.24                                 | 6.54                                 |
| 5.2                  | 6.64                          | 2.55                                 | 7.68                                 |
| 5.4                  | 10.26                         | 6.44                                 | 21.99                                |
| 5.6                  | 17.12                         | 18.08                                | 55.62                                |

| Sample 3       |                               |                                      |                                      |
|----------------|-------------------------------|--------------------------------------|--------------------------------------|
| Section height | Cross-sectional area <i>A</i> | Axial second moment of area <i>I</i> | Polar second moment of area <i>J</i> |
| [mm]           | [mm <sup>2</sup> ]            | [mm <sup>4</sup> ]                   | [mm <sup>4</sup> ]                   |
| 0.0            | 5.67                          | 2.25                                 | 5.18                                 |
| 0.2            | 5.77                          | 2.33                                 | 5.36                                 |
| 0.4            | 6.25                          | 2.51                                 | 6.43                                 |
| 0.6            | 6.02                          | 2.54                                 | 5.84                                 |
| 0.8            | 5.81                          | 2.37                                 | 5.44                                 |
| 1.0            | 5.57                          | 2.10                                 | 5.03                                 |
| 1.2            | 5.57                          | 2.18                                 | 5.00                                 |
| 1.4            | 6.00                          | 2.43                                 | 5.84                                 |
| 1.6            | 5.86                          | 2.38                                 | 5.53                                 |
| 1.8            | 6.23                          | 2.63                                 | 6.30                                 |
| 2.0            | 5.97                          | 2.36                                 | 5.80                                 |
| 2.2            | 6.13                          | 2.39                                 | 6.16                                 |
| 2.4            | 6.37                          | 2.68                                 | 6.59                                 |
| 2.6            | 6.85                          | 3.19                                 | 7.60                                 |
| 2.8            | 6.57                          | 2.89                                 | 6.99                                 |
| 3.0            | 6.77                          | 3.10                                 | 7.40                                 |
| 3.2            | 6.88                          | 3.20                                 | 7.65                                 |

| Sample 3 (continued) |                               |                                      |                                      |
|----------------------|-------------------------------|--------------------------------------|--------------------------------------|
| Section height       | Cross-sectional area <i>A</i> | Axial second moment of area <i>I</i> | Polar second moment of area <i>J</i> |
| [mm]                 | [mm <sup>2</sup> ]            | [mm <sup>4</sup> ]                   | [mm <sup>4</sup> ]                   |
| 3.4                  | 6.86                          | 3.23                                 | 7.60                                 |
| 3.6                  | 6.93                          | 3.41                                 | 7.73                                 |
| 3.8                  | 7.03                          | 3.55                                 | 7.92                                 |
| 4.0                  | 6.93                          | 3.61                                 | 7.67                                 |
| 4.2                  | 7.35                          | 4.18                                 | 8.63                                 |
| 4.4                  | 7.61                          | 4.53                                 | 9.25                                 |
| 4.6                  | 7.83                          | 5.38                                 | 10.08                                |
| 4.8                  | 7.69                          | 5.14                                 | 9.48                                 |
| 5.0                  | 7.35                          | 5.09                                 | 8.73                                 |
| 5.2                  | 7.40                          | 4.63                                 | 8.87                                 |
| 5.4                  | 8.06                          | 6.04                                 | 10.50                                |
| 5.6                  | 8.45                          | 6.49                                 | 11.50                                |
| 5.8                  | 12.70                         | 15.35                                | 27.06                                |
| 6.0                  | 21.75                         | 42.01                                | 76.70                                |
| 6.2                  | 42.00                         | 141.75                               | 308.43                               |

| Sample 4       |                               |                                      |                                      |
|----------------|-------------------------------|--------------------------------------|--------------------------------------|
| Section height | Cross-sectional area <i>A</i> | Axial second moment of area <i>I</i> | Polar second moment of area <i>J</i> |
| [mm]           | [mm <sup>2</sup> ]            | [mm <sup>4</sup> ]                   | [mm <sup>4</sup> ]                   |
| 0.0            | 6.25                          | 2.53                                 | 6.37                                 |
| 0.2            | 6.88                          | 2.94                                 | 7.78                                 |
| 0.4            | 7.41                          | 3.38                                 | 9.09                                 |
| 0.6            | 6.04                          | 2.58                                 | 5.85                                 |
| 0.8            | 5.63                          | 2.36                                 | 5.06                                 |
| 1.0            | 5.39                          | 1.87                                 | 4.86                                 |
| 1.2            | 6.05                          | 2.66                                 | 5.85                                 |
| 1.4            | 5.66                          | 2.37                                 | 5.12                                 |
| 1.6            | 5.75                          | 2.38                                 | 5.29                                 |
| 1.8            | 5.74                          | 2.47                                 | 5.26                                 |
| 2.0            | 5.60                          | 2.35                                 | 5.00                                 |
| 2.2            | 5.71                          | 2.32                                 | 5.23                                 |
| 2.4            | 5.57                          | 2.31                                 | 4.95                                 |
| 2.6            | 5.57                          | 2.31                                 | 4.96                                 |
| 2.8            | 5.53                          | 2.32                                 | 4.88                                 |
| 3.0            | 5.50                          | 2.22                                 | 4.86                                 |
| 3.2            | 5.60                          | 2.35                                 | 5.02                                 |
| 3.4            | 5.53                          | 2.35                                 | 4.89                                 |
| 3.6            | 5.54                          | 2.37                                 | 4.89                                 |
| 3.8            | 5.64                          | 2.38                                 | 5.10                                 |
| 4.0            | 5.61                          | 2.46                                 | 5.03                                 |
| 4.2            | 5.48                          | 2.46                                 | 4.79                                 |

| Sample 4 (continued) |                               |                                      |                                      |
|----------------------|-------------------------------|--------------------------------------|--------------------------------------|
| Section height       | Cross-sectional area <i>A</i> | Axial second moment of area <i>I</i> | Polar second moment of area <i>J</i> |
| [mm]                 | [mm <sup>2</sup> ]            | [mm <sup>4</sup> ]                   | [mm <sup>4</sup> ]                   |
| 4.4                  | 5.97                          | 2.77                                 | 5.69                                 |
| 4.6                  | 5.73                          | 2.59                                 | 5.26                                 |
| 4.8                  | 5.45                          | 2.25                                 | 4.78                                 |
| 5.0                  | 5.81                          | 2.75                                 | 5.40                                 |
| 5.2                  | 6.06                          | 3.01                                 | 5.87                                 |
| 5.4                  | 5.91                          | 2.88                                 | 5.59                                 |
| 5.6                  | 5.81                          | 2.71                                 | 5.40                                 |
| 5.8                  | 6.16                          | 2.93                                 | 6.05                                 |
| 6.0                  | 5.97                          | 2.83                                 | 5.70                                 |
| 6.2                  | 6.22                          | 2.75                                 | 6.27                                 |
| 6.4                  | 6.67                          | 2.95                                 | 7.30                                 |
| 6.6                  | 12.49                         | 13.09                                | 30.38                                |

| Sample 5       |                               |                                      |                                      |
|----------------|-------------------------------|--------------------------------------|--------------------------------------|
| Section height | Cross-sectional area <i>A</i> | Axial second moment of area <i>I</i> | Polar second moment of area <i>J</i> |
| [mm]           | [mm <sup>2</sup> ]            | [mm <sup>4</sup> ]                   | [mm <sup>4</sup> ]                   |
| 0.0            | 5.05                          | 1.80                                 | 4.12                                 |
| 0.2            | 5.28                          | 1.89                                 | 4.51                                 |
| 0.4            | 5.13                          | 1.74                                 | 4.28                                 |
| 0.6            | 5.12                          | 1.80                                 | 4.23                                 |
| 0.8            | 5.07                          | 1.82                                 | 4.14                                 |
| 1.0            | 5.25                          | 1.88                                 | 4.46                                 |
| 1.2            | 5.32                          | 1.90                                 | 4.58                                 |
| 1.4            | 5.33                          | 1.97                                 | 4.58                                 |
| 1.6            | 5.30                          | 1.88                                 | 4.55                                 |
| 1.8            | 5.27                          | 1.98                                 | 4.48                                 |
| 2.0            | 4.56                          | 1.25                                 | 3.53                                 |
| 2.2            | 5.29                          | 1.97                                 | 4.50                                 |
| 2.4            | 5.43                          | 2.06                                 | 4.84                                 |
| 2.6            | 5.67                          | 2.14                                 | 5.23                                 |
| 2.8            | 5.38                          | 2.10                                 | 4.64                                 |
| 3.0            | 5.67                          | 2.27                                 | 5.20                                 |
| 3.2            | 6.21                          | 2.96                                 | 6.45                                 |
| 3.4            | 4.38                          | 0.99                                 | 3.94                                 |
| 3.6            | 5.58                          | 2.19                                 | 5.05                                 |
| 3.8            | 6.58                          | 2.87                                 | 7.39                                 |
| 4.0            | 6.36                          | 2.79                                 | 6.63                                 |
| 4.2            | 5.62                          | 2.42                                 | 5.21                                 |
| 4.4            | 4.57                          | 0.96                                 | 4.12                                 |
| 4.6            | 5.45                          | 1.71                                 | 5.20                                 |
| 4.8            | 5.94                          | 2.41                                 | 5.76                                 |

| Sample 5 (continued) |                          |                                 |                                 |
|----------------------|--------------------------|---------------------------------|---------------------------------|
| Section height       | Cross-sectional area $A$ | Axial second moment of area $I$ | Polar second moment of area $J$ |
| [mm]                 | [mm <sup>2</sup> ]       | [mm <sup>4</sup> ]              | [mm <sup>4</sup> ]              |
| 5.0                  | 5.64                     | 2.10                            | 5.45                            |
| 5.2                  | 6.48                     | 2.82                            | 6.88                            |
| 5.4                  | 12.92                    | 31.17                           | 43.76                           |
| 5.6                  | 24.55                    | 37.21                           | 189.23                          |

| Sample 6 (detailed serial section) |                          |                                 |                                 |                            |                                              |
|------------------------------------|--------------------------|---------------------------------|---------------------------------|----------------------------|----------------------------------------------|
| Section height                     | Cross-sectional area $A$ | Axial second moment of area $I$ | Polar second moment of area $J$ | Number of vascular bundles | Area fraction of the vascular bundles $AF_v$ |
| [mm]                               | [mm <sup>2</sup> ]       | [mm <sup>4</sup> ]              | [mm <sup>4</sup> ]              | [-]                        | [%]                                          |
| 0.0                                | 7.84                     | 6.94                            | 10.45                           | 5.00                       | 7.20                                         |
| 0.1                                | 10.69                    | 13.38                           | 19.69                           | 6.00                       | 6.07                                         |
| 0.3                                | 11.66                    | 16.55                           | 23.77                           | 6.00                       | 6.87                                         |
| 0.4                                | 11.33                    | 15.10                           | 22.09                           | 8.00                       | 5.15                                         |
| 0.5                                | 12.12                    | 17.56                           | 25.65                           | 9.00                       | 4.98                                         |
| 0.6                                | 7.59                     | 6.49                            | 9.76                            | 8.00                       | 5.62                                         |
| 0.7                                | 11.47                    | 14.98                           | 22.50                           | 8.00                       | 4.63                                         |
| 0.8                                | 11.26                    | 14.74                           | 21.78                           | 8.00                       | 5.27                                         |
| 0.9                                | 7.47                     | 6.38                            | 9.49                            | 7.00                       | 5.54                                         |
| 1.0                                | 10.36                    | 11.94                           | 18.06                           | 8.00                       | 5.85                                         |
| 1.1                                | 7.22                     | 5.69                            | 8.75                            | 6.00                       | 6.17                                         |
| 1.2                                | 10.05                    | 11.39                           | 17.13                           | 7.00                       | 5.54                                         |
| 1.3                                | 10.57                    | 11.96                           | 18.62                           | 7.00                       | 5.43                                         |
| 1.4                                | 10.64                    | 12.43                           | 19.12                           | 7.00                       | 5.63                                         |
| 1.5                                | 9.91                     | 10.73                           | 16.48                           | 7.00                       | 5.42                                         |
| 1.6                                | 9.63                     | 9.74                            | 15.43                           | 6.00                       | 5.90                                         |
| 1.7                                | 10.71                    | 12.32                           | 19.26                           | 6.00                       | 6.20                                         |
| 1.8                                | 8.32                     | 7.14                            | 11.42                           | 6.00                       | 6.35                                         |
| 1.9                                | 9.72                     | 9.59                            | 15.53                           | 7.00                       | 5.72                                         |
| 2.0                                | 9.68                     | 9.49                            | 15.38                           | 7.00                       | 6.36                                         |
| 2.1                                | 10.32                    | 10.91                           | 17.54                           | 7.00                       | 6.92                                         |
| 2.2                                | 8.30                     | 6.87                            | 11.25                           | 8.00                       | 6.08                                         |
| 2.3                                | 8.54                     | 6.63                            | 11.80                           | 9.00                       | 7.66                                         |
| 2.4                                | 8.73                     | 7.55                            | 12.45                           | 7.00                       | 7.49                                         |
| 2.5                                | 6.66                     | 4.23                            | 7.22                            | 8.00                       | 6.61                                         |
| 2.6                                | 9.42                     | 8.12                            | 14.31                           | 10.00                      | 5.56                                         |
| 2.7                                | 10.86                    | 10.87                           | 19.10                           | 9.00                       | 5.44                                         |
| 2.8                                | 11.25                    | 11.38                           | 20.44                           | 10.00                      | 4.76                                         |
| 2.9                                | 11.80                    | 11.96                           | 22.44                           | 10.00                      | 4.31                                         |
| 3.0                                | 12.00                    | 12.47                           | 23.06                           | 10.00                      | 4.35                                         |
| 3.1                                | 12.13                    | 12.44                           | 23.62                           | 10.00                      | 3.48                                         |
| 3.2                                | 13.34                    | 15.07                           | 28.51                           | 10.00                      | 4.03                                         |
| 3.3                                | 13.16                    | 14.47                           | 27.75                           | 9.00                       | 3.24                                         |

| Sample 6 (detailed serial section) (continued) |                          |                                 |                                 |                            |                                              |
|------------------------------------------------|--------------------------|---------------------------------|---------------------------------|----------------------------|----------------------------------------------|
| Section height                                 | Cross-sectional area $A$ | Axial second moment of area $I$ | Polar second moment of area $J$ | Number of vascular bundles | Area fraction of the vascular bundles $AF_v$ |
| [mm]                                           | [mm <sup>2</sup> ]       | [mm <sup>4</sup> ]              | [mm <sup>4</sup> ]              | [-]                        | [%]                                          |
| 3.4                                            | 13.26                    | 14.57                           | 28.23                           | 9.00                       | 3.38                                         |
| 3.5                                            | 13.94                    | 15.58                           | 31.17                           | 9.00                       | 2.97                                         |
| 3.6                                            | 15.27                    | 18.71                           | 37.55                           | 9.00                       | 2.53                                         |
| 3.7                                            | 16.13                    | 20.41                           | 42.21                           | 9.00                       | 2.84                                         |
| 3.8                                            | 17.00                    | 22.58                           | 46.94                           | 8.00                       | 2.25                                         |
| 3.9                                            | 18.51                    | 26.82                           | 55.58                           | 8.00                       | 2.30                                         |
| 4.0                                            | 20.34                    | 31.15                           | 67.77                           | 8.00                       | 2.11                                         |
| 4.1                                            | 20.57                    | 32.58                           | 74.12                           | 8.00                       | 1.94                                         |
| 4.2                                            | 25.49                    | 53.36                           | 105.94                          | 8.00                       | 1.64                                         |
| 4.4                                            | 25.45                    | 62.31                           | 117.32                          | 8.00                       | 1.68                                         |
| 4.5                                            | 30.09                    | 93.62                           | 175.69                          | 8.00                       | 1.51                                         |
| 4.6                                            | 26.29                    | 67.19                           | 120.48                          | 8.00                       | 1.54                                         |
| 4.7                                            | 28.92                    | 106.33                          | 171.65                          | 8.00                       | 2.04                                         |

**Explanations:**

basal end of the sample => section height: 0.0 mm
